1     **Differential induction of interferon stimulated genes between type I and**  
2     **type III interferons is independent of interferon receptor abundance**

3

4     Kalliopi Pervolaraki<sup>1,2</sup>, Soheil Rastgou Talemi<sup>3,4</sup>, Dorothee Albrecht<sup>1</sup>, Felix  
5     Bormann<sup>5</sup>, Connor Bamford<sup>6</sup>, Juan Mendoza<sup>7</sup>, Christopher Garcia<sup>7</sup>, John  
6     McLauchlan<sup>6</sup>, Thomas Höfer<sup>3,4</sup>, Megan L. Stanifer<sup>1,¶</sup>, Steeve Boulant<sup>1,2,¶,\*</sup>

7

8     <sup>1</sup> Schaller research group at CellNetworks, Department of Infectious

9     Diseases, Virology, Heidelberg University Hospital, Heidelberg, Germany

10    <sup>2</sup> Division of Cellular polarity and viral infection, German Cancer Research  
11    Center (DKFZ), Heidelberg, Germany

12    <sup>3</sup> Division of Theoretical Systems Biology, German Cancer Research Center  
13    (DKFZ), Heidelberg, Germany

14    <sup>4</sup> BioQuant Center, Heidelberg University, Heidelberg, Germany

15    <sup>5</sup> Division of Epigenetics, German Cancer Research Center (DKFZ),  
16    Heidelberg, Germany

17    <sup>6</sup> MRC- University of Glasgow Centre for Virus Research, Glasgow, United  
18    Kingdom

19    <sup>7</sup> Howard Hughes Medical Institute, Department of Molecular and Cellular  
20    Physiology and Department of Structural Biology, Stanford University School  
21    of Medicine, Standford, CA, United States of America

22

23    \*Corresponding author: e-mail: [s.boulant@dkfz.de](mailto:s.boulant@dkfz.de) (SB)

24

25    ¶ These authors contributed equally to this work

## 26 **Abstract**

27           It is currently believed that type I and III interferons (IFNs) have  
28 redundant functions. However, the preferential distribution of type III IFN  
29 receptor on epithelial cells suggests functional differences at epithelial  
30 surfaces. Here, using human intestinal epithelial cells we could show that  
31 although both type I and type III IFNs confer an antiviral state to the cells, they  
32 do so with distinct kinetics. Type I IFN signaling is characterized by an acute  
33 strong induction of interferon stimulated genes (ISGs) and confers fast  
34 antiviral protection. On the contrary, the slow acting type III IFN mediated  
35 antiviral protection is characterized by a weaker induction of ISGs in a  
36 delayed manner compared to type I IFN. Moreover, while transcript profiling  
37 revealed that both IFNs induced a similar set of ISGs, their temporal  
38 expression strictly depended on the IFNs, thereby leading to unique antiviral  
39 environments. Using a combination of data-driven mathematical modeling and  
40 experimental validation, we addressed the molecular reason for this  
41 differential kinetic of ISG expression. We could demonstrate that these kinetic  
42 differences are intrinsic to each signaling pathway and not due to different  
43 expression levels of the corresponding IFN receptors. We report that type III  
44 IFN is specifically tailored to act in specific cell types not only due to the  
45 restriction of its receptor but also by providing target cells with a distinct  
46 antiviral environment compared to type I IFN. We propose that this specific  
47 environment is key at surfaces that are often challenged with the extracellular  
48 environment.

49

## 50 **Author summary**

51           The human intestinal tract plays two important roles in the body: first it  
52 is responsible for nutrient absorption and second it is the primary barrier  
53 which protects the human body from the outside environment. This complex  
54 tissue is constantly exposed to commensal bacteria and is often exposed to  
55 both bacterial and viral pathogens. To protect itself, the gut produces, among  
56 others, secreted agents called interferons which help to fight against pathogen  
57 attacks. There are several varieties (type I, II, and III) of interferons and our  
58 work aims at understanding how type I and III interferon act to protect human  
59 intestinal epithelial cells (hIECs) during viral infection. In this study, we  
60 confirmed that both interferons can protect hIECs against viral infection but  
61 with different kinetics. We determined that type I confer an antiviral state to  
62 hIECs faster than type III interferons. We uncovered that these differences  
63 were intrinsic to each pathway and not the result of differential abundance of  
64 the respective interferon receptors. The results of this study suggest that type  
65 III interferon may provide a different antiviral environment to the epithelium  
66 target cells which is likely critical for maintaining gut homeostasis. Our  
67 findings will also help us to design therapies to aid in controlling and  
68 eliminating viral infections of the gut.

## 70 Introduction

71 During viral infection interferons (IFNs) are the predominant cytokines  
72 made to combat viral replication and spread. Following binding to specific  
73 receptors, IFNs induce a JAK/STAT signaling cascade which results in the  
74 production of interferon stimulated genes (ISGs). These ISGs will then  
75 establish an antiviral state within the cell and will also alert surrounding cells  
76 and immune cells to assist in viral clearance [1]. There are three classes of  
77 IFNs. Type I IFNs are produced by all cell types and are recognized by the  
78 ubiquitously expressed heterodimeric receptor IFNAR1/IFNAR2. Type II IFNs  
79 are only produced by immune cells [2,3]. Type III IFNs are made by all cell  
80 types but the IFNLR1 (or IL28Ra) subunit of the heterodimeric receptor  
81 IFNLR1/IL10R $\beta$  is restricted to epithelial and barrier surfaces and to a subset  
82 of immune cells [4–9]. Despite the fact that type I and type III IFNs are  
83 structurally unrelated and engage different receptors, signaling downstream of  
84 both receptors exhibits a remarkable overlap and leads to the induction of a  
85 similar pool of ISGs. These observations originally led to the hypothesis that  
86 type I and III IFNs were functionally redundant.

87 This model has been challenged more and more in recent studies  
88 which highlight that the cell type specific compartmentalization of IFNLR1  
89 provides type III IFNs a unique potential for targeting local infections at  
90 mucosal surfaces. For example, *in vivo* data on enteric virus infection of the  
91 murine gastrointestinal tract showed that responsiveness to type III IFN is  
92 necessary and sufficient to protect murine intestinal epithelial cells (IECs)  
93 against rotavirus and reovirus infection [10–12]. On the contrary, type I IFN

94 was necessary to protect against viral infection of cells in the lamina propria  
95 and against systemic spread [10,11]. Likewise, it was demonstrated that fecal  
96 shedding of norovirus was increased in IFNLR1-deficient, but not IFNAR1-  
97 deficient, mice, showing that type III IFN uniquely controls local norovirus  
98 infection in the gut [13,14]. Similarly, in the respiratory tract, type III IFNs are  
99 predominately produced upon infection with influenza A virus [15–19].  
100 However, as infection progresses type I IFN comes into play to reinforce viral  
101 inhibition by inducing a pro-inflammatory response [20].

102 Differences in the antiviral activity conferred by both cytokines appear  
103 to be not only driven by the spatial restriction of their receptors but also by  
104 intrinsic subtle differences in signal transduction. It was demonstrated, in  
105 human hepatocytes and lung epithelial cells, that type I IFN confers a more  
106 potent antiviral protection compared to type III IFNs [5,21–23]. Additionally, it  
107 was shown in human IECs that type III IFN partially requires MAP kinase  
108 activation to promote an antiviral state while type I IFN was independent of it  
109 [24]. Although it has been reported in many studies that very similar ISGs are  
110 induced upon type I or type III IFN stimulation of cells, work mostly performed  
111 in hepatocytes revealed that both cytokines induce these ISGs with different  
112 kinetics [21,25–27]. Type III IFN mediated signaling was found to be  
113 associated with a delayed and reduced induction of ISGs compared to type I  
114 IFNs [25,26]. Similar differences in the magnitude and/or kinetics of ISGs  
115 induction upon type I versus type III IFN treatment were observed in human  
116 primary keratinocytes, airway epithelial cells and in Burkitt's lymphoma  
117 derived B (Raji) cells, as well as in murine intestinal and lung epithelial cells  
118 and immune cells [20,28–31].

119           The molecular mechanisms leading to this delayed and reduced  
120 induction of ISGs upon type III IFN treatment remains unclear. As these  
121 differences in kinetics of ISG expression between both IFNs could not be  
122 directly explained by their signaling cascades an alternative explanation was  
123 proposed where type III IFN receptor is expressed at lower levels at the cell  
124 surface. This lower receptor expression level could provide a biochemical  
125 explanation for the observed differences in delayed kinetics and weaker  
126 amplitude of ISG expression compared to type I IFN. However, to date, there  
127 is no direct experimental evidence for this model. Similarly, whether the  
128 observed differences between both IFNs is intrinsic to both specific signal  
129 transduction pathways and whether it is restricted to some cell types (e.g.  
130 hepatocytes) or represents a global signaling signature in all cells expressing  
131 both IFN receptors has not been fully addressed.

132           In this study, we have investigated how type I and III IFNs establish  
133 their antiviral program in human mini-gut organoids and human IEC lines. We  
134 found that type I IFN can protect human IECs against viral infection faster  
135 than its type III IFN counterpart. Correspondingly, we determined that type I  
136 IFN displays both a greater magnitude and faster kinetics of ISG induction  
137 compared to the milder, slower type III IFN. By developing mathematical  
138 models describing both type I and type III IFN mediated production of ISGs  
139 and by using functional receptor overexpression approaches, we  
140 demonstrated that the observed lower magnitude of ISG expression for type  
141 III IFNs was partially the result of its lower receptor expression level compared  
142 to the type I IFN receptor. Inversely, the observed delayed kinetics of type III  
143 IFN cannot be explained by receptor expression level indicating that this

144 property is specific to type III IFN and inherent to its signaling pathway. Our  
145 results highlight important differences existing between both type I and type III  
146 IFN-mediated antiviral activity and ISG expression which are not only the  
147 result of receptor compartmentalization but also through intrinsic fundamental  
148 differences in each IFN-mediated signaling pathway.

149

## 150 **Results**

### 151 **Type III IFN-mediated antiviral protection is delayed compared to type I** 152 **IFN.**

153 We have previously reported that both type I and III IFNs mediate  
154 antiviral protection in human IECs [24]. To address whether type I and type III  
155 IFN have a different profile of antiviral activity in primary non-transformed  
156 human IECs, as reported in human lung cells [22], we compared the antiviral  
157 potency of both IFNs in human mini-gut organoids. Colon organoids were pre-  
158 treated with increasing concentrations of either type I or III IFNs for 2.5 hours  
159 and subsequently infected with vesicular stomatitis virus expressing luciferase  
160 (VSV-Luc). Viral infection was assayed by bioluminescence and results  
161 showed that both IFNs induced an antiviral state in a dose-dependent  
162 manner. We observed that type I IFN was slightly more potent in protecting  
163 against viral infection at higher concentration compare to type III IFNs. Type I  
164 IFN could almost fully inhibit viral infection while type III IFN was only able to  
165 reduce infection to around 80% (Fig 1A). Interestingly, the concentration of  
166 type I IFN necessary to provide 90% of relative antiviral protection (EC90)  
167 was significantly lower than the one for type III IFN (Fig 1B).

168 To determine whether type III IFN requires a prolonged treatment to  
169 achieve similar antiviral protection as observed with type I IFN, we performed  
170 a time course experiment in which human colon organoids were pre-treated  
171 for different times with either IFN prior infection with VSV-Luc (Fig 1C). We  
172 found that approximately 2 hours pre-treatment with type I IFN was sufficient  
173 to reduce VSV infection by 90% (10% remaining infection), while type III IFN  
174 required around 5 hours to achieve a 90% reduction of infectivity (Fig 1C and  
175 1D). Interestingly, 24 hours of pretreatment was necessary for type III IFN to  
176 almost completely prevent VSV infection (Fig 1C). These results strongly  
177 suggest that both type I and type III IFN could have similar potency but that  
178 type III IFN requires more time to establish an antiviral state.

179 We next addressed how long after infection IFN treatment is still able to  
180 promote antiviral protection. Colon organoids were infected with VSV-Luc and  
181 treated at different times post-infection with either type I or III IFNs.  
182 Interestingly, type I IFN could inhibit viral replication even when added several  
183 hours post-infection. In contrast, type III IFN appeared to require a much  
184 longer time to establish its antiviral activity and was unable to efficiently  
185 protect the organoids after VSV infection has initiated (Fig 1E and 1F).

186 Importantly, these differences in the kinetics of antiviral activity of type I  
187 versus type III IFNs were neither donor nor colon specific as similar results  
188 were observed in intestinal ileum-derived organoids derived from different  
189 donors (Sup Fig 1). In addition, human colon carcinoma-derived cell lines T84  
190 (Sup Fig 2) and SKCO15 (data not shown) fully phenocopy the difference in  
191 type I versus type III IFN antiviral activity generated by primary mini-gut



192 organoids. Taken together these results demonstrate that while both type I  
193 and III IFNs can promote similar antiviral states into target cells, they do so  
194 with distinct kinetics. The cytokine-induced antiviral state is promoted faster  
195 by type I IFN compared to type III IFN.

196 **Type I and III IFNs induce different amplitudes and kinetics of ISG**  
197 **expression.**

198 To understand how type I and type III IFNs promote an antiviral state in  
199 primary IECs but with different kinetics, we analyzed the magnitude of ISG  
200 expression over time upon IFN treatment. Colon organoids were treated with  
201 increasing concentrations of either type I or type III IFN and the expression  
202 levels of two representative ISGs (IFIT1 and Viperin) were assayed at  
203 different times post-IFN treatment. Results revealed that type I IFN ultimately  
204 leads to a significantly higher induction of both IFIT1 and Viperin compared to  
205 type III IFN (Fig 2A and 2B). This difference in the magnitude of ISG  
206 stimulation was independent of the duration of IFN treatment (Fig 2A and 2B).  
207 To determine if this pattern of expression applies to other ISGs, we treated  
208 colon organoids with either type I or type III IFN over a 24-hour time course,  
209 and analyzed the mRNA levels of 132 different ISGs and transcription factors  
210 involved in IFN signaling (see complete list of genes and corresponding  
211 primers in Sup Table 1 and 2) (Fig 2C and 2D). Differential expression  
212 analysis revealed that both type I and type III IFNs induce almost the same  
213 set of ISGs and that most of the genes significantly induced by type III IFN  
214 were also induced by type I IFN (Fig 2C). However, similar to IFIT1 and  
215 Viperin (Fig 2A and 2B), we found that the magnitude of ISG expression was

216 greater for type I IFN compared to type III IFN (Fig 2D). Similar results were  
217 found in the immortalized colon carcinoma-derived T84 cells (Sup Fig 3A-C).

218 To address whether there is any correlation between the different  
219 antiviral protection kinetics conferred by type I and III IFNs (Fig 1) and the  
220 kinetics of ISG expression, we analyzed the temporal expression of ISGs  
221 upon IFN treatment of human colon organoids. Hierarchical clustering  
222 analysis of all ISGs up-regulated upon type I or type III IFN treatment defined  
223 four distinct expression profiles based on the time of their maximum induction  
224 (Fig 3A-C). Group 1 are ISGs whose expression peaks 3 hours post-IFN  
225 treatment. The expression of ISGs in group 2 and 3 peaks at 6 and 12 hours  
226 post-treatment, respectively. Group 4 corresponds to ISGs with a continuous  
227 increase in expression over time (Fig 3A and B). Under type I IFN treatment,  
228 ISGs were nearly equally distributed in all four expression groups (Fig 3A, 3C,  
229 and 3D). By contrast, although the same ISGs were induced by type III IFN,  
230 they almost all belong to the expression group 4, being expressed later after  
231 IFN treatment (Fig 3B-D). In line with the primary mini-gut organoids, T84  
232 cells presented similar differences in the kinetics of ISGs expression (Sup Fig  
233 3D). Importantly, cell polarization of human IECs did not impact the kinetics of  
234 ISG expression as similar results were obtained when comparing polarized  
235 vs. non-polarized T84 cells (data not shown).

236 We next wanted to control that our observed differences in the kinetics  
237 of ISGs expression induced by both cytokines were independent of IFN  
238 concentration. Colon organoids were treated with increasing amounts of type I  
239 or type III IFNs and the transcriptional up-regulation of representative ISGs

240 belonging to each of the expression profile groups (group 1-4) was measured  
241 over time (Fig 4). Consistent with our previous results, the temporal  
242 expression patterns of each representative ISGs were independent of the IFN  
243 concentration and the ISG expression kinetic signature was specific to each  
244 IFN (Fig 4). Complementarily, to address whether the observed differences  
245 between type I and type III IFNs were not due to the lower affinity of type III  
246 IFN for its receptor compared to type I IFN, we employed the high affinity  
247 variant of type III IFN (H11-IFN $\lambda$ 3) [32] to monitor the kinetics of ISG  
248 expression. Results show that cells treated with the higher affinity H11-IFN $\lambda$ 3  
249 display a higher magnitude of ISG expression but their kinetics of expression  
250 were unchanged (Sup Fig 4). Altogether, our results strongly suggest that  
251 although both type I and type III IFNs induce a similar set of ISGs in hIECs,  
252 type III IFN induces globally a lower amplitude and a delayed ISG expression  
253 compared to type I IFN.

254 **Mathematical modeling shows that IFN receptor abundance modulates**  
255 **the magnitude of ISG response while the type I and type III IFN specific**  
256 **kinetic profiles are independent of receptor abundance**

257 Our data show remarkable differences in the magnitude and kinetics of ISGs  
258 induced by type I versus type III IFN (Fig 2-3 and Sup Fig 3), and in the  
259 subsequent induction of a differential antiviral state (Fig 1 and Sup Fig 1-2).  
260 To investigate the mechanisms underlying these differences, we used data-  
261 driven mathematical modeling and model selection. We considered three  
262 mechanistic causes for the observed differential signaling: (1) Receptor  
263 abundance (different number of IFNLR compared to IFNAR complexes); (2)

264 Receptor regulation (different rates of activation and/or inactivation of IFNLR  
265 compared to IFNAR complexes); (3) STAT activation (different rates of STAT  
266 activation by type I and type III IFNs). We devised corresponding  
267 mathematical models describing the dynamics of receptor activation and  
268 inactivation, STAT1/2 phosphorylation and STAT-dependent activation of ISG  
269 expression (Fig 5A). The models were implemented as systems of ordinary  
270 differential equations (Sup Table 3) and fitted to the time-resolved data for the  
271 prototypical ISG, Viperin, measured with different doses of type I or type III  
272 IFNs and with the high affinity H11-IFN $\lambda$ 3. We ranked the models according to  
273 the Akaike information criterion corrected for small sample size (AICc), which  
274 evaluates the goodness of fit and, at the same time, penalizes the number of  
275 fit parameters (for more details see Materials and Methods). Throughout, we  
276 allowed different receptor abundance, but this difference alone could not  
277 account for the different signaling dynamics (Fig 5B; model M<sub>1</sub> has negligible  
278 support by the data, as quantified by the small AICc weight, which is a weight  
279 of evidence for the respective model). Interestingly, in addition to receptor  
280 abundance, the best-fitting model (M<sub>3</sub>) has also different rates of activation  
281 and inactivation of IFNLR and IFNAR complexes. However, alternative  
282 models with different rates of STAT activation and/or ISG expression have  
283 good performance (M<sub>2</sub> and M<sub>4</sub>, respectively). Therefore, the modeling  
284 indicates that differential ISG activation by type I and type III IFNs is likely due  
285 to different abundance of the respective receptors and cell-intrinsic  
286 differences in how the signals from bound receptors are processed.

287 The best-fitting model (M<sub>3</sub>) accounted for the dose-response and the different  
288 Viperin expression kinetics triggered by type I, type III and the high affinity

289 H11-IFN $\lambda$ 3 in T84 cells, group 3 and group 4 expression kinetics, respectively  
290 (Fig 5C, D). The different kinetics of the IFN responses – fast and transient for  
291 type I IFN vs slower and sustained for type III IFN – are predicted to be largely  
292 due to receptor inactivation, which is faster for IFNAR than for IFNLR complex  
293 (Sup Fig 5A-C). Interestingly, the model shows that at low IFN concentrations,  
294 Viperin is induced almost equally by both IFNs whereas at higher  
295 concentrations, type I IFN induces Viperin more strongly (Fig 5E). These  
296 dose-dependent features agree with our experimental data (Sup Fig 3B, right  
297 panel).

298       Next, we tested the pivotal impact of receptor expression on ISG  
299 induction that was indicated by our model. Specifically, the model predicts that  
300 an increase in IFNAR1 or IFNLR1 level will increase the amplitude of ISG  
301 induction while preserving the specific kinetic profiles elicited by the two types  
302 of IFNs (Sup Fig 5D-E). To experimentally validate the model predictions,  
303 IFNAR1 and IFNLR1 were overexpressed in T84 cells. Overexpression of the  
304 respective IFN receptor chain was confirmed by reverse quantitative PCR  
305 (Sup Fig 6). To ensure the functionality of both IFN receptors, IFNAR1 or  
306 IFNLR1 were expressed in our previously characterized knockout T84 cell  
307 lines deficient for either the IFN alpha receptor 1 (IFNAR1<sup>-/-</sup>) or the IFN  
308 lambda receptor 1 (IFNLR1<sup>-/-</sup>) (Sup Fig 7A and 7E) [24]. Our results show  
309 that overexpression of IFNAR1 in our IFNAR1<sup>-/-</sup> T84 cells (IFNAR1<sup>-/-</sup>  
310 +rIFNAR1) restores their antiviral activity, their ability to phosphorylate STAT1  
311 and induce the production of the ISGs IFIT1 and Viperin in the presence of  
312 type I IFN (Sup Fig 7B-D). Similarly, although IFNLR1<sup>-/-</sup> cells were insensitive  
313 to type III IFN treatment, overexpression of IFNLR1 (IFNLR1<sup>-/-</sup>+rIFNLR1)

314 restored their antiviral activity, pSTAT1 and ISG induction after addition of  
315 type III IFN (Sup Fig 7F-H). These results demonstrate the functionality of  
316 both IFN receptors and validate our overexpression approach as a means to  
317 increase IFNAR1 and IFNLR1 levels at the cell surface.

318 Wild-type T84 cells overexpressing type I IFN receptor (WT+rIFNAR1)  
319 were treated with increasing concentrations of type I IFN. Our results showed  
320 elevated levels of STAT1 phosphorylation and ISG induction in response to  
321 stimulation with type I IFN compared to wild-type cells (Fig 6A-D). Importantly,  
322 the response of T84 cells overexpressing type I IFN receptor to type III IFN  
323 remained unchanged, indicating a selective enhancement of the type I IFN  
324 signaling pathway. Similarly, overexpression of type III IFN receptor  
325 (WT+rIFNLR1) shows a significant increase in phosphorylated STAT1 and  
326 ISG expression compared to wild-type cells upon type III IFN stimulation,  
327 while no difference was observed upon type I IFN treatment (Fig 6E-H).  
328 Altogether, our experimental data are consistent with the modeling predictions  
329 and confirm the crucial impact of surface receptor levels for regulating the  
330 magnitude of type I and III IFN response.

331 We next addressed whether this increase of ISG expression in cells  
332 overexpressing either the type I or type III IFN receptor was associated with  
333 an improved antiviral activity. Wild-type T84 cells overexpressing type I IFN  
334 receptor (WT+rIFNAR1) were treated with type I IFN at different time points  
335 prior to infection with VSV-Luc virus and their antiviral activity was compared  
336 to wild-type T84 cells. Our results showed that the potency and the kinetics of  
337 the antiviral activity of cells overexpressing type I IFN receptor does not

338 present any significant change upon type I IFN treatment (Sup Fig 8A).  
339 Similarly, there is no difference in the antiviral activity when cells  
340 overexpressing type I IFN receptor were treated with type I IFN at different  
341 time points post-infection (Sup Fig8B). However, overexpression of type III  
342 IFN receptor (WT+rIFNLR1) shows a modest but significant enhancement in  
343 type III IFN antiviral potency in the earlier time points of pre-treatment  
344 (between 30 minutes and 2 hours) compared to wild-type cells upon type III  
345 IFN stimulation (Sup Fig 8G), while they responded similarly to wild-type cells  
346 upon type I IFN treatment (Sup Fig 8E). Consistent with this, cells  
347 overexpressing type III IFN receptor are more protected than wild-type cells  
348 when type III IFN was added post-infection for the early time points (Sup Fig  
349 8H).

350 Finally, to experimentally validate the limited impact of the IFN  
351 receptors abundance on the kinetic profile of ISG expression, as predicted by  
352 the model (Sup Fig 5D-E), wild-type cells overexpressing either of the IFN  
353 receptors were treated with increasing doses of type I or type III IFNs and the  
354 expression of a representative ISG belonging to each of the expression profile  
355 groups (group 1-4, Fig 3) was analyzed over time (Fig 7A-D). The  
356 experimental data show that the amplitude of ISG expression was dependent  
357 on both the dose of IFNs used to stimulate the cells and on the expression  
358 levels of the IFN receptors (Fig 7A-D). Importantly, the kinetic profile of ISG  
359 expression was similar between WT cells and cells overexpressing the  
360 IFNAR1 (WT+rIFNAR1), independent of the applied IFN type I dose (Fig 7A-D  
361 left panel). Similarly, wild-type cells overexpressing the IFNLR1  
362 (WT+rIFNLR1) showed no change in the kinetic profile of ISG induction upon

363 type III IFN stimulation (Fig 7A-D right panel). Moreover, we found that the  
364 model reproduced the kinetic dose-response data when the IFNAR1 and  
365 IFNLR1 expression levels were increased ~2.6 and ~1.5 times, respectively,  
366 while all other parameters were held constant (Sup Fig 9). Indeed, we found  
367 that IFNAR1 overexpression was stronger than IFNLR1 overexpression, as  
368 judged by the transcript levels (Sup Fig 6B-C), with the ratio being consistent  
369 with the model prediction (Sup Fig 9D and Sup Fig 6B-C).

370 To directly correlate ISG expression kinetics and amplitude with the  
371 expression level of the type III IFN receptor, we thought of overexpressing an  
372 IFNLR1 tagged with the GFP fluorescent protein (IFNLR1-GFP) in human  
373 IECs. To control the functionality of the GFP tagged receptor, the IFNLR1-  
374 GFP construct was overexpressed in the human embryonic kidney cell line  
375 293 HEK, which normally elicit a very limited response upon type III IFN  
376 treatment. Quantitative RT-PCR revealed that 293 HEK cells overexpressing  
377 IFNLR1-GFP produced significantly more ISGs upon type III IFN treatment  
378 compared to WT 293 HEK cells or 293 HEK cells expression GFP alone (data  
379 not shown). Wild-type T84 cells overexpressing the IFNLR1-GFP  
380 (WT+rIFNLR1-GFP) were treated with type III IFN over time and cells were  
381 sorted by flow cytometry based on their level of IFNLR1-GFP expression (no  
382 GFP expressing (neg), or low and high GFP expressing cells) (Fig 8A). The  
383 induction of a representative ISG belonging to each of the expression profile  
384 groups (group 1-4, Fig 3) was measured over time in each sorted population  
385 (negative, low and high, Fig 8B). As anticipated, WT cells overexpressing the  
386 IFNLR1-GFP chain show stronger ISG expression compared to WT cells and  
387 the magnitude of the ISG induction correlates with the relative levels of



388 IFNLR1 expression (Fig 8B). However, the kinetic profiles of the ISGs upon  
389 type III IFN stimulation were not affected by the differential expression levels  
390 of the IFNLR1 chain (Fig 8B).

391           Altogether, our results demonstrate that type I and type III IFNs both  
392 induce an antiviral state in hIECs but with different kinetics. We could show  
393 that although both cytokines induce similar ISGs, type III IFN does it with  
394 slower kinetics and lower amplitude of individual ISG expression compared to  
395 type I IFN. Importantly, coupling mathematical modeling of both type I and  
396 type III IFN-mediated signaling and overexpression of functional IFN receptors  
397 approaches allowed us to demonstrate that these kinetic differences in type I  
398 and type III IFN ISG expression are not due to different expression level of the  
399 respective IFN receptors but are intrinsic to type I and type III IFN signaling  
400 pathways.

## 402 **Discussion**

403           In this work, we have for the first time, performed a parallel study of the  
404 role of type I and III IFN in human mini-gut organoids and IEC lines. Our  
405 results demonstrate that type I and III IFNs are unique in their magnitude and  
406 kinetics of ISG induction. Type I IFN signaling is characterized by relatively  
407 strong expression of ISGs and confers to cells a fast-antiviral protection. On  
408 the contrary, the slow acting type III IFN mediated antiviral protection is  
409 characterized by a weak induction of ISGs in a delayed manner compared to  
410 type I IFN. Our results are in line with previous studies which also  
411 demonstrated that type III IFN is less potent than its type I IFN counterpart  
412 [5,21,23,33,34]. Additionally, we have confirmed that the delayed ISG  
413 induction seen upon type III IFN treatment of hepatocytes [21,23,25,26] is not  
414 tissue specific but likely represents a global pattern of action of this cytokine in  
415 cells expressing the type III IFN receptor (i.e. human epithelial cells). In other  
416 words, the different kinetics of ISG expression induced by type I and type III  
417 IFNs are specific to each IFN signaling pathways.

418           In the current work, we have employed, a data-driven mathematical  
419 modeling approach to explain signal transduction kinetic differences  
420 downstream type I and type III IFN receptors. While type I IFN-mediated  
421 signaling has been previously modeled [35,36], type III IFN has not. Our  
422 model predicted that the receptor levels directly influence the magnitude of  
423 ISG expression however, the kinetics of ISG expression appear to be intrinsic  
424 to each IFN-signaling pathway and is largely preserved under receptor  
425 overexpression. This prediction was experimentally validated by studying the

426 response of wild-type and IFN receptor overexpressing cells to different doses  
427 of IFN (Fig 7A-C and Fig 8). This suggests that the kinetic differences in the  
428 ISG induction are intrinsic to each IFN signaling pathway. We propose that  
429 these phenotypic differences reflect functional differences, which are  
430 important for mounting a well-tailored antiviral innate immune response at  
431 mucosal surfaces where type III IFN receptors are expressed.

432 Both type I and III IFNs have unique and independent receptors which  
433 are structurally unrelated. These receptors are likely expressed at different  
434 levels on individual cells and their relative expression to each other might also  
435 be cell type specific. To address whether the unique ISG and antiviral  
436 expression kinetics shown by each IFN were not due to differences in their  
437 expression levels, we overexpressed into cells functional type I (rIFNAR1) and  
438 type III IFN (rIFNLR1) receptors. Our results from IFNAR1 overexpressing  
439 cells (Fig 6 and 7) are in line with previous studies showing a direct  
440 relationship between the surface levels of type I IFN receptors and the  
441 magnitude of ISG induction [37,38]. Interestingly, we could demonstrate a  
442 similar relationship when overexpressing IFNLR1 (Fig 6 and 7) which was  
443 also associated with an increase of type III IFN antiviral potency (Sup Fig 8).  
444 These findings are in agreement with previous experiments which show that  
445 overexpression of IFNLR1 in cells which normally do not express this IFN  
446 receptor rescues both type III IFN-mediated signaling and IFN-mediated  
447 antiviral protection [5,28]. Our IFN receptor overexpression approach  
448 demonstrates that the observed differences in ISG expression kinetics are not  
449 the results of different levels of receptors at the cell surface but is likely  
450 specific to each signal transduction pathway. Apart from the expression levels

451 of IFN receptors, lower binding affinity towards their respective receptors  
452 could be an alternative explanation for the differential potencies of both type I  
453 and type III IFNs. Multiple studies have tried to affect the binding affinity of  
454 type I IFNs with their receptors however, results suggest that wild-type IFNs  
455 exert their antiviral activities already at maximum potency. Modifications  
456 leading to an increased affinity for their receptors do not lead to improvement  
457 of antiviral potency [32,38–41]. To address whether the weaker activity of type  
458 III IFN could be the result of its weaker affinity for its receptor, Mendoza et al,  
459 engineered a variant of type III IFN with higher-affinity for its receptor (H11-  
460 IFN $\lambda$ 3). They showed increased IFN signaling and antiviral activity in  
461 comparison with wild-type IFN $\lambda$ 3. However, the engineered variant of IFN $\lambda$ 3  
462 was still acting with weaker efficacy compared to type I IFNs [32]. By  
463 exploiting the high affinity variant H11-IFN $\lambda$ 3, we could also show a significant  
464 increase of the amplitude of ISG expression but importantly, the kinetics of  
465 ISG expressions were not altered (Sup Fig 4).

466 Our results indicate a model where inherent temporal differences exist  
467 between type I and type III IFNs signaling. These differences are not the  
468 result of differential surface expression of the receptors but is the result of  
469 distinct signaling cascades from the receptors to the nucleus or within  
470 regulatory mechanisms of gene expressions.

471 While few studies have focused on the endocytosis and inactivation of  
472 IFNAR1, there is no information about how these processes occur for  
473 IFNLR1. It has been shown that the ternary IFNAR complex is internalized by  
474 clathrin mediated endocytosis [42] and that upon type I IFN stimulation,

475 IFNAR1 is rapidly endocytosed and routed for lysosomal degradation [43,44],  
476 whereas IFNAR2 can be recycled back to the cell surface or degraded [45].  
477 Our data-driven mathematical modeling approach suggests a different kinetics  
478 of receptor activation/inactivation between both IFNs (Fig 5B and Sup Fig 5A).  
479 Therefore, further studies investigating trafficking of IFNLR1 will be important  
480 and may show that subtle changes in the time course of receptors  
481 internalization, recycling or degradation can have profound effect on kinetics  
482 of IFN activity. Apart from receptor internalization and degradation, several  
483 molecular mechanisms leading to IFN receptor inactivation have been  
484 described, such as de-phosphorylation [46,47], or by negatively targeting the  
485 interaction of IFNAR1 with downstream signaling elements of the JAK/STAT  
486 signaling, for instance ubiquitin-specific protease USP18, and members of the  
487 suppressor of cytokine signaling protein (SOCS) family. In particular, the  
488 inhibitory role of SOCS1 in type I IFN signaling has been demonstrated in a  
489 number of previous studies, where they have shown that SOCS1 associates  
490 with TyK2 and blocks its interaction with IFNAR1 [48]. USP18 has also been  
491 shown as an important negative regulator of type I IFN signaling with a dual  
492 role acting as isopeptidase which removes the ubiquitin like-ISG15 from target  
493 proteins [49] and as a competitor of JAK1 for binding to IFNAR2 [50].  
494 Although, limited information is available for negative regulators of the IFNLR  
495 receptor complex, the specific contribution of USP18 or SOCS in inhibition of  
496 type I versus type III IFN mediated signaling has been addressed in recent  
497 studies. In particular, it has been showed that both type I and III IFNs (IFN $\alpha$ ,  
498 IFN $\beta$  and IFN $\lambda$ 1,  $\lambda$ 2,  $\lambda$ 3 and  $\lambda$ 4) induced the expression of USP18, SOCS1  
499 and SOCS3 [51–57] and overexpression of all these negative regulators

500 inhibited both IFN $\alpha$  and IFN $\lambda$ 1 mediated JAK-STAT signaling [54,56]  
501 suggesting that at “supraphysiological” expression levels all the inhibitors can  
502 block type I and type III mediated JAK-STAT signaling [56]. Additionally, it has  
503 been shown that USP18 is induced later and that its level increased over time,  
504 correlating with the long lasting refractoriness of IFN $\alpha$  signaling [51,52,56]. In  
505 our study we observed also a later peak of induction of USP18 at 12h or 24h  
506 upon type I or type III IFNs, respectively. In line with the above-mentioned  
507 studies we also observed rapid and transient induction of SOCS1 upon type I  
508 IFN treatment and sustained induction upon type III IFN stimulation. However,  
509 further investigation is required to determine the correlation of the kinetics of  
510 induction of these negative regulators with the ISGs induction in type I versus  
511 type III IFN treatment in human IECs.

512 In the canonical type I and III IFN signaling pathway the next  
513 downstream players from the IFN receptors are the JAKs, STAT1, STAT2 and  
514 IRF9, which are all regulated on the level of expression and activation. Our  
515 own observations (data not shown) and previous studies could not explain the  
516 major differences in the kinetics of type I versus type III IFNs activity by  
517 focusing on the time course of phosphorylation of STATs [21,25]. However,  
518 given that alternative modifications of STATs (e.g. phosphorylation on  
519 alternative residues, acetylation, methylation and sumoylation patterns) have  
520 been proposed to contribute to the activity of type I IFNs [26,58–60] it might  
521 be possible that new modifiers of STAT activity may determine the kinetic  
522 pattern of action of type I versus type III IFNs. In addition, apart from the  
523 JAK/STAT axis, there is accumulating evidence which correlates ISG  
524 transcription upon IFN treatment with a plethora of JAK-STAT independent

525 pathways, such as members of the CRK [61–63] and MAPKinase family  
526 [24,28,64–66], which might also temporally coordinate IFNs kinetic profile of  
527 action. Apart from the differences in the signaling cascade of type I versus  
528 type III IFNs, an explanation for their differential kinetics of action might stem  
529 from the physiology of the different cell types. For example, in a recent study  
530 Bhushal et al. reported that polarization of mouse intestinal epithelial cells  
531 eliminates the kinetic differences between type I and type III IFNs, by  
532 accelerating type III IFN responses [33,67].

533         Several studies describing the transcriptional activities of both type I  
534 and type III IFNs have reported that very similar sets of ISGs are produced  
535 upon both type I and III IFN stimulation [12,17,21,22,25,28] while only few  
536 ISGs appear to be predominantly expressed upon type III IFN treatment in  
537 murine IECs [67]. We believe that there are several functional advantages for  
538 adopting a lower and slower activity, like the profile of action of type III IFN, in  
539 the antiviral protection of epithelial tissues. The differences in the temporal  
540 expression of ISGs could create unique antiviral environments for each IFN.  
541 Many ISGs function as pro-inflammatory factors [30,68]. By stimulating ISGs  
542 production in high magnitude, an excessive amount of antiviral and pro-  
543 inflammatory signals could be produced which on the one hand will eliminate  
544 efficiently viral spreading but on the other hand may cause local exacerbated  
545 inflammation and irreversible tissue damage, leading to chronic inflammation  
546 in mucosal surfaces.

547         In addition, the expression of different functional groups of ISGs at  
548 early and at late time points (Fig 3) might allow cells to create two distinct

549 phases within the antiviral response. At early time points, minimum levels of  
550 ISGs may act to protect the host against viral infection. Antiviral ISGs will be  
551 responsible for fighting the pathogens and pro-inflammatory ISGs will  
552 stimulate members of the adaptive immune system to assist the antiviral  
553 protection. At later time points the produced ISGs, may be involved in anti-  
554 inflammatory processes, such as resolving of inflammation and tissue healing  
555 and repair [66,69]. To exert this anti-inflammatory role, ISGs may need to be  
556 produced in higher levels, as they might act more paracrine and spread  
557 through the tissue to balance again the tissue homeostasis after the viral  
558 attack. In conclusion, we propose that type III IFN-mediated signaling is not  
559 only set to act predominantly at epithelium surfaces due to the restriction of its  
560 receptor but also is specifically tailored to mount a distinct immune state  
561 compared to other IFNs which is critical for mucosal surfaces that face the  
562 challenge.

563

## 564 **Materials and Methods**

### 565 **Antibodies/Reagents**

566 Commercially available primary antibodies were mouse monoclonal  
567 antibodies recognizing beta-Actin (Sigma #A5441), phospho STAT1 and  
568 STAT1 (BD Transductions #612233 and #610115, respectively). Anti-mouse  
569 (GE Healthcare #NA934V), coupled with horseradish peroxidase was used as  
570 secondary antibody for Western blot at a 1:5000 dilution. Human recombinant  
571 IFN-beta1a (IFN $\beta$ ) was obtained from Biomol (#86421). Recombinant human  
572 IFN $\lambda$ 1 (IL-29) (#300-02L) and IFN $\lambda$ 2 (IL28A) (#300-2K) were purchased from  
573 Peprotech and IFN $\lambda$ 3 (IL-28B) from Cell signaling (#8796). High affinity



574 engineered IFN $\lambda$ 3 variant (H11) and wild type IFN $\lambda$ 3 were produced as  
575 described in [32]. The IFN concentrations used to treat the cells are stated in  
576 the main text and in the figure legends.

577

### 578 **Cell and Viruses**

579 T84 human colon carcinoma cells (ATCC CCL-248) were maintained in a  
580 50:50 mixture of Dulbecco's modified Eagle's medium (DMEM) and F12  
581 (GibCo) supplemented with 10% fetal bovine serum and 1%  
582 penicillin/streptomycin (GibCo). SKCO15 cells were maintained in DMEM with  
583 10% fetal bovine serum, 1% penicillin/streptomycin, 15mM HEPES and 1%  
584 NEAA (Non-Essential Amino Acids). Mini-gut organoids were harvested and  
585 maintained as described earlier [24]. VSV-Luc was used as previously  
586 described [24].

587

### 588 **Ethics Statement**

589 Human colon tissue was received from colon and small intestine resection  
590 from the University Hospital Heidelberg. This study was carried out in  
591 accordance with the recommendations of "University Hospital Heidelberg"  
592 with written informed consent from all subjects. All subjects gave written  
593 informed consent in accordance with the Declaration of Helsinki. All samples  
594 were received and maintained in an anonymized manner. The protocol was  
595 approved by the "Ethic commission of University Hospital Heidelberg" under  
596 the approved study protocol S-443/2017.

597

### 598 **RNA isolation, cDNA, and qPCR**

599 RNA was harvested from cells using NucleoSpin RNA extraction kit  
600 (Macherey-Nagel) as per manufacturer's instructions. cDNA was made using  
601 iSCRIPT reverse transcriptase (BioRad) from 200ng of total RNA as per  
602 manufacturer's instructions. qRT-PCR was performed using SsoAdvanced  
603 SYBR green (BioRad) as per manufacturer's instructions, TBP and HPRT1  
604 were used as normalizing genes.

605

### 606 **Gene expression analysis of interferon stimulating genes**

607 Colon organoids and T84 cells were treated with 2000 RU/ml of type I IFN ( $\beta$ )  
608 or 100 ng/ml of each type III IFN ( $\lambda$ 1,2 and 3). Total RNA was isolated at 3, 6,  
609 12 and 24h post-treatment as described above. For the gene expression  
610 analysis of interferon stimulated genes (ISGs), qRT-PCR was performed  
611 using the predesigned 384-well assay of type I IFN response for use with  
612 SYBR Green assaying the expression of 87 ISGs (Biorad # 10034592). The  
613 expression of 45 additional ISGs and transcriptional factors was analyzed by  
614 qRT-PCR with primer sets obtained as previously described [27]. The  
615 complete gene list monitored in this study and the primers used to amplify  
616 each gene is available in Tables S1 and S2. Differential expression analysis  
617 of each treatment was performed by comparing the baseline expression of  
618 genes in an untreated control at each time point. Only genes which were  
619 either induced or reduced more than 2-fold in any of the samples were  
620 considered to be significantly regulated. These genes were either analyzed  
621 using scatterplots or visualized by a heatmap after sorting the fold change of  
622 expression in response to type I IFN ( $\beta$ ) in decreasing order. For the T84 cells  
623 all fold change values above 20 and below 0.05 were replaced with 20 and

624 0.05 respectively. For the organoids, the fold change values above 800 and  
625 below 1/800 were replaced with 800 and 1/800. This data adaptation was  
626 done to center the heatmap around 0 (white) and to avoid errors in logarithmic  
627 calculations. When visualizing the expression peaks, only the highest value is  
628 shown per time point for each gene. All analyses were performed using R  
629 version 3.3.0 and 3.3.3 including the packages gplots and ggplot2.

630

### 631 **Western blot**

632 At time of harvest, media was removed, cells were rinsed one time with 1X  
633 PBS and lysed with 1X RIPA buffer (150 mM sodium chloride, 1.0% Triton X-  
634 100, 0.5% sodium deoxycholate, 0.1% sodium dodecyl sulphate (SDS), 50  
635 mM Tris, pH 8.0 with phosphatase and protease inhibitors (Sigma-Aldrich)) for  
636 20mins at 4°C. Lysates were collected and equal protein amounts were  
637 separated by SDS-PAGE and blotted onto a PVDF membrane by wet-blotting.  
638 Membranes were blocked with 5% milk or 5% BSA, when the phospho STAT1  
639 antibody is used, in TBS containing 0.1% Tween 20 (TBS-T) for one hour at  
640 room temperature. Primary antibodies were diluted in blocking buffer and  
641 incubated overnight at 4°C. Membranes were washed 4X in TBS-T for 15mins  
642 at RT. Secondary antibodies were diluted in blocking buffer and incubated at  
643 RT for 1h with rocking. Membranes were washed 4X in TBS-T for 15mins at  
644 RT. HRP detection reagent (GE Healthcare) was mixed 1:1 and incubated at  
645 RT for 5mins. Membranes were exposed to film and developed.

646

### 647 **VSV luciferase assay**

648 Colon organoids and T84 cells were seeded in a white F-bottom 96-well plate.  
649 Samples were pre-treated prior to infection or treated post-infection as  
650 indicated with increasing concentrations of type I or type III IFNs. VSV-Luc  
651 was added to the wells and the infection was allowed to proceed for 8hrs. At  
652 the end of the infection, media was removed, samples were washed 1X with  
653 PBS and lysed with Cell Lysis Buffer (Promega) at RT for 20 mins. A 1:1  
654 dilution of Steady Glo (Promega) and Lysis Buffer were added to the samples  
655 and incubated at RT for 15 mins. Luminescence was read using an Omega  
656 Luminometer.

657

#### 658 **FACS analysis**

659 Fluorescence-activated cell sorting (FACS) was performed  
660 on FACSMelody™ Cell Sorter (BD Biosciences). DAPI was added for nuclear  
661 staining. Data were processed using FlowJo 10.0.5.

662

663

#### 664 **Cloning and generation of stable cell lines**

665 Knockout of IFNAR1 and IFNLR1 in T84 cells were achieved by using the  
666 CRISPR/Cas9 system as described earlier [24]. For back-compensation of the  
667 IFN receptor KO cell lines and for generation of wild-type T84 cells  
668 overexpressing the IFNAR1 and IFNLR1, plasmids containing the cDNA of  
669 IFNAR1 and IFNLR1 were obtained from a gateway compatible ORF bank  
670 (pENTRY221-IFNAR1) and from GE Healthcare (pCR\_XL\_TOPO\_IFNLR1,  
671 #MHS6278-213246004), respectively. The IFNLR1-GFP construct (pC1-  
672 HsIFNLR1-GFP) was generated using the following cloning strategy. A  
673 mammalian expression plasmid producing a N-terminal EGFP-tagged

674 extracellular domain of IFNLR1 (EGFP-IFNLR1) was generated as follows:  
675 cDNA corresponding to this open reading from was generated synthetically  
676 (GeneArt, Life Technologies) and subsequently sub-cloned directly into the  
677 pC1 expression plasmid (Promega) backbone. Specifically, monomeric EGFP  
678 was introduced between the signal peptide sequence and the remaining  
679 glycoprotein flanked by three alanine residues at its amino terminus and a  
680 short glycine-serine linker sequence of N-AAASGSGS-C at its carboxyl  
681 terminus. Tri-alanine flanking allowed facile incorporation of restriction  
682 enzyme sites (Not1 and SacII) allowing removal or swapping of EGFP tag.  
683 Sequences available on request. Caspase-cleavage resistant IFNAR1 and  
684 IFNLR1 were generated using the Quick Change II XL site directed  
685 mutagenesis kit (Agilent Technologies, Germany), following manufacturer's  
686 instructions. Point mutations were controlled by plasmid sequencing. The  
687 expression vectors were generated by inserting the respective constructs into  
688 the lentiviral vector pDest GW35 by using the Gateway cloning technology  
689 (Life Technologies, Germany) according to manufacturer's instructions.  
690 Lentiviruses were produced as previously described [24], and T84 cells were  
691 transduced two times using concentrated stocks of lentiviral particles  
692 encoding the cleavage resistant IFNAR1 and IFNLR1. 36 hours post-  
693 transduction, transduced cells were selected for using blasticidin.

694

### 695 **Model simulation and parameter estimation**

696 The mathematical model was implemented in terms of ordinary differential  
697 equations (ODEs) in MATLAB 2016b (S3 Table). The numerical simulations  
698 were conducted using the CVODES, a module from SUNDIALS numerical

699 simulation package, in the MATLAB environment. The model was initially set to  
700 a steady state condition and most of the initial conditions were set (S4 Table).  
701 Only, the IFNLR efficacy factor was estimated using time-resolved ISG  
702 expression data that we measured with different doses of type I IFN ( $\beta$ ) or III  
703 IFN ( $\lambda 1-3$ ). All of the ISG expression data for the IFNAR1 and IFNLR1  
704 overexpression experiments were reproduced only by fitting new initial values  
705 of IFNAR1 and IFNLR1 (S5 Table).  
706 Parameter estimation was conducted by minimizing the weighted nonlinear  
707 least squares,

$$708 \quad wSSR = \sum_{i=1}^N \left( \frac{1}{Average(y_{observed,i})} \right) \sum_{j=1}^M (y_{simulation,i,j} - y_{observed,i,j})^2,$$

709 of model simulations versus data points,  $j = 1, \dots, M$ , of different experiments,  
710  $i = 1, \dots, N$ . The inverse of the average of every time-resolved experimental  
711 data was used as a weighting factor for fitting the corresponding data.

712

713

#### 714 **Profile-likelihood analysis**

715 To assess the uncertainty in the estimated parameter values, we used the  
716 profile-likelihood method [70]. In this method, the parameter confidence  
717 bounds are calculated based on their contribution to the likelihoods, or in  
718 another word, the objective function (wSSR). This computational approach is  
719 conducted in a stepwise manner. In every step, the respective parameter is  
720 fixed at a new value distant from the optimum estimated one. Then, the new  
721 maximum likelihood is calculated ( $wSSR_{\min}(\theta)$ ). Using this approach, we can

722 calculate the profile of the maximum likelihoods over different values of the  
723 considered parameter. Then a threshold,  $\Delta_\alpha$ ,

724

$$725 \quad \Delta\chi^2 = wSSR_{\min}(\theta) - wSSR_{\min}(\theta_{\text{optimum}}),$$
$$726 \quad \{\theta \mid \Delta\chi^2 < \Delta_\alpha\},$$

727

728 is used to define the confidence bounds for the respective parameter. The  
729 threshold,  $\Delta_\alpha$ , is the  $\alpha$  quantile of the chi-squared distribution.

730

### 731 **Approximate 95% confidence bands calculation**

732 To investigate the effect of the parameter uncertainty on model predictions we  
733 calculated approximate 95% confidence bands, as explained in Seber and  
734 Wild [71].

735

$$736 \quad \text{Approx 95\% confidence bands} = y_{\text{simulated}} \pm t_{\text{invN-P}}^\alpha \cdot \sqrt{\text{MSE}}$$
$$\quad \cdot (1 + S \cdot (S \cdot S)^{-1} \cdot S)^{\frac{1}{2}}$$

737

738 where “ $t_{\text{invN-P}}^\alpha$ ” is the  $\alpha$  quantile of student's t distribution, “N” is the number of  
739 data points and “P” is the number of estimated model parameters, “MSE” is  
740 the mean standard error and “S” is the sensitivity matrix of the respective  
741 simulated observable.

742

### 743 **Model selection**

744 To select the most parsimonious model, the simplest model with good  
745 predictive power, from the ensemble of the four alternative models of the ISG

746 response to type I versus type III interferon, we used the Akaike information  
747 criterion corrected for small sample size (AICc). After fitting the models to the  
748 experimental data, we calculate the AICc score for every model. AICc is  
749 calculated as:

$$750 \quad AICc = n \left( \ln \left( \frac{2\pi \cdot wSSR}{n} \right) + 1 \right) + 2k + \frac{2k(k+1)}{n-k-1},$$

751 where  $n$  is the number of data points used to fit the model,  $k$  is the number of  
752 estimated parameters of the respective model, and  $wSSR$  is the minimum  
753 weighted sum of squared residuals for the respective model. The model with  
754 the minimum AICc value is selected as the most parsimonious model from the  
755 ensemble of alternative models. In order to compare the selected model with  
756 other models, we calculate both  $\Delta AICc$ , the difference between the AICc  
757 value of the models with the minimum AICc value from the ensemble of the  
758 models, and the AICc weight ( $w_i$ ). The Akaike weight is a weight of evidence  
759 for the respective model and is calculated as:

$$760 \quad w_i = \frac{\exp\left(-\frac{1}{2}\Delta AICc_i\right)}{\sum_{r=1}^M \exp\left(-\frac{1}{2}\Delta AICc_r\right)}.$$

761

762

## 763 **Acknowledgments**

764 We are grateful to the following colleagues for providing reagents  
765 Ronald L. Rabin and Lynnsey A. Renn (Center for Biologics Evaluation and  
766 Research, US Food and Drug Administration, USA) for the transcription factor  
767 primers, Sean Whelan (Harvard Medical School, USA) for the VSV-Luc and  
768 Asma Nusrat (University of Michigan, USA) for the SKCO15 cells. We would  
769 like to thank the members of Steeve Boulant Lab (Heidelberg University



770 Hospital, Germany) for their insights and helpful discussions in preparing the  
771 manuscript. We would like to thank the FACS facility at the EMBL, Heidelberg  
772 for their assistance in sorting the INFLR-GFP expressing cells.

773

## 774 **References**

- 775 1. Takeuchi O, Akira S. Innate immunity to virus infection. 2009;227:75–  
776 86.
- 777 2. Kawai T, Akira S. Innate immune recognition of viral infection. Nat  
778 Immunol. 2006;7(2):131–7.
- 779 3. Koyama S, Ishii KJ, Coban C, Akira S. Innate immune response to viral  
780 infection. Cytokine. 2008;43(3):336–41.
- 781 4. Kotenko S V, Gallagher G, Baurin V V, Lewis-Antes A, Shen M, Shah  
782 NK, et al. IFN-lambdas mediate antiviral protection through a distinct  
783 class II cytokine receptor complex. Nat Immunol. 2003;4(1):69–77.
- 784 5. Sheppard P, Kindsvogel W, Xu W, Henderson K, Schlutsmeyer S,  
785 Whitmore TE, et al. IL-28, IL-29 and their class II cytokine receptor IL-  
786 28R. Nat Immunol. 2003;4(1):63–8.
- 787 6. Sommereyns C, Paul S, Staeheli P, Michiels T. IFN-lambda (IFN-??) is  
788 expressed in a tissue-dependent fashion and primarily acts on epithelial  
789 cells in vivo. PLoS Pathog. 2008;4(3):1–12.
- 790 7. Mordstein M, Neugebauer E, Ditt V, Jessen B, Rieger T, Falcone V, et  
791 al. Lambda interferon renders epithelial cells of the respiratory and  
792 gastrointestinal tracts resistant to viral infections. J Virol.  
793 2010;84(11):5670–7.
- 794 8. Donnelly RP, Kotenko S V. Interferon-lambda: a new addition to an old

- 795 family. *J Interferon Cytokine Res.* 2010;30(8):555–64.
- 796 9. Durbin RK, Kotenko S V., Durbin JE. Interferon induction and function at  
797 the mucosal surface. *Immunol Rev.* 2013;255(1):25–39.
- 798 10. Pott J, Mahlaköiv T, Mordstein M, Duerr CU, Michiels T, Stockinger S,  
799 et al. IFN-lambda determines the intestinal epithelial antiviral host  
800 defense. *Proc Natl Acad Sci U S A.* 2011;108(19):7944–9.
- 801 11. Mahlaköiv T, Hernandez P, Gronke K, Diefenbach A, Staeheli P.  
802 Leukocyte-Derived IFN- $\alpha/\beta$  and Epithelial IFN- $\lambda$  Constitute a  
803 Compartmentalized Mucosal Defense System that Restricts Enteric  
804 Virus Infections. *PLoS Pathog.* 2015;11(4):1–19.
- 805 12. Lin J Da, Feng N, Sen A, Balan M, Tseng HC, McElrath C, et al. Distinct  
806 Roles of Type I and Type III Interferons in Intestinal Immunity to  
807 Homologous and Heterologous Rotavirus Infections. *PLoS Pathog.*  
808 2016;12(4):1–29.
- 809 13. Baldrige MT, Nice TJ, McCune BT, Yokoyama CC, Kambal A,  
810 Wheadon M, et al. Commensal microbes and interferon-lambda  
811 determine persistence of enteric murine norovirus  
812 infection\_supplemental data. *Science.* 2014;3(November):1–9.
- 813 14. Nice TJ, Baldrige MT, McCune BT, Norman JM, Lazear HM, Artyomov  
814 M, et al. Interferon- $\lambda$  cures persistent murine norovirus infection in the  
815 absence of adaptive immunity. *Science (80- ).* 2015;347(6219):269–73.
- 816 15. Contoli M, Message SD, Laza-Stanca V, Edwards MR, Wark P a B,  
817 Bartlett NW, et al. Role of deficient type III interferon-lambda production  
818 in asthma exacerbations. *Nat Med.* 2006;12(9):1023–6.
- 819 16. Baños-Lara MDR, Harvey L, Mendoza A, Simms D, Chouljenko VN,

- 820 Wakamatsu N, et al. Impact and regulation of lambda interferon  
821 response in human metapneumovirus infection. *J Virol.*  
822 2015;89(1):730–42.
- 823 17. Crotta S, Davidson S, Mahlakoiv T, Desmet CJ, Buckwalter MR, Albert  
824 ML, et al. Type I and Type III Interferons Drive Redundant Amplification  
825 Loops to Induce a Transcriptional Signature in Influenza-Infected Airway  
826 Epithelia. *PLoS Pathog.* 2013;9(11).
- 827 18. Jewell N a, Cline T, Mertz SE, Smirnov S V, Flano E, Schindler C, et al.  
828 Interferon- $\lambda$  is the predominant interferon induced by influenza A  
829 virus infection in vivo. *J Virol.* 2010;84(21):11515–22.
- 830 19. Ank N, Iversen MB, Bartholdy C, Staeheli P, Hartmann R, Jensen UB,  
831 et al. An Important Role for Type III Interferon (IFN- $\lambda$ /IL-28) in TLR-  
832 Induced Antiviral Activity. *J Immunol.* 2008;180(4):2474–85.
- 833 20. Galani IE, Triantafyllia V, Eleminiadou EE, Koltsida O, Stavropoulos A,  
834 Manioudaki M, et al. Interferon- $\lambda$  Mediates Non-redundant Front-Line  
835 Antiviral Protection against Influenza Virus Infection without  
836 Compromising Host Fitness. *Immunity.* 2017;46(5):875–890.e6.
- 837 21. Marcello T, Grakoui A, Barba-Spaeth G, Machlin ES, Kotenko S V.,  
838 Macdonald MR, et al. Interferons  $\lambda$  and  $\lambda$  Inhibit Hepatitis C Virus  
839 Replication With Distinct Signal Transduction and Gene Regulation  
840 Kinetics. *Gastroenterology.* 2006;131(6):1887–98.
- 841 22. Voigt E a., Yin J. Kinetic Differences and Synergistic Antiviral Effects  
842 Between Type I and Type III Interferon Signaling Indicate Pathway  
843 Independence. *J Interf Cytokine Res.* 2015;0(0):150504080007003.
- 844 23. Kohli A, Zhang X, Yang J, Russell RS, Donnelly RP, Sheikh F, et al.

- 845            Distinct and overlapping genomic profiles and antiviral effects of  
846            Interferon-lambda and -alpha on HCV-infected and noninfected  
847            hepatoma cells. *J Viral Hepat.* 2012 Dec;19(12):843–53.
- 848    24.    Pervolaraki K, Stanifer ML, Münchau S, Renn LA, Albrecht D, Kurzhals  
849            S, et al. Type I and type III interferons display different dependency on  
850            mitogen-activated protein kinases to mount an antiviral state in the  
851            human gut. *Front Immunol.* 2017;8(APR):1–16.
- 852    25.    Jilg N, Lin W, Hong J, Schaefer E a., Wolski D, Meixong J, et al. Kinetic  
853            differences in the induction of interferon stimulated genes by interferon-  
854             $\alpha$  and interleukin 28B are altered by infection with hepatitis C virus.  
855            *Hepatology.* 2014;59(4):1250–61.
- 856    26.    Bolen CR, Ding S, Robek MD, Kleinstein SH. Dynamic expression  
857            profiling of type I and type III interferon-stimulated hepatocytes reveals  
858            a stable hierarchy of gene expression. *Hepatology.* 2014;59(4):1262–  
859            72.
- 860    27.    Novatt H, Theisen TC, Massie T, Massie T, Simonyan V. in Response  
861            to Interferon b and Interferon I 1. 2016;36(10):589–98.
- 862    28.    Zhou Z, Hamming OJ, Ank N, Paludan SR, Nielsen AL, Hartmann R.  
863            Type III Interferon (IFN) Induces a Type I IFN-Like Response in a  
864            Restricted Subset of Cells through Signaling Pathways Involving both  
865            the Jak-STAT Pathway and the Mitogen-Activated Protein Kinases. *J*  
866            *Virology.* 2007;81(14):7749–58.
- 867    29.    Alase AA, El-Sherbiny YM, Vital EM, Tobin DJ, Turner NA, Wittmann M.  
868            IFN $\lambda$  stimulates MxA production in human dermal fibroblasts via a  
869            MAPK-dependent STAT1-independent mechanism. *J Invest Dermatol.*

- 870 2015;135(12):2935–43.
- 871 30. Davidson S, McCabe TM, Crotta S, Gad HH, Hessel EM, Beinke S, et  
872 al. IFN  $\kappa$  is a potent anti-influenza therapeutic without the inflammatory  
873 side effects of IFN  $\alpha$  treatment. 2016;8(9):1099–112.
- 874 31. Broggi A, Tan Y, Granucci F, Zanoni I. IFN- $\lambda$  suppresses intestinal  
875 inflammation by non-translational regulation of neutrophil function. Nat  
876 Immunol. 2017;18(10):1084–93.
- 877 32. Mendoza JL, Schneider WM, Hoffmann H, Jong YP De, Rice CM,  
878 Garcia KC, et al. The IFN- $\beta$ -IFN- $\gamma$ -IR1-IL-10R $\beta$  Complex Reveals  
879 Structural Features Underlying Type III IFN Functional Plasticity Article  
880 The IFN- $\beta$ -IFN- $\gamma$ -IR1-IL-10R $\beta$  Complex Reveals Structural Features  
881 Underlying. Immunity. 2017;46(3):379–92.
- 882 33. Bhushal S, Wolfsmüller M, Selvakumar TA, Kemper L. Cell Polarization  
883 and Epigenetic Status Shape the Heterogeneous Response to Type III  
884 Interferons in Intestinal Epithelial Cells. 2017;8(June).
- 885 34. Meager A, Visvalingam K, Dilger P, Bryan D, Wadhwa M. Biological  
886 activity of interleukins-28 and -29: Comparison with type I interferons.  
887 Cytokine. 2005;31(2):109–18.
- 888 35. Rand U, Rinas M, Werk JS, Nöhren G, Linnes M, Kröger A, et al. Multi-  
889 layered stochasticity and paracrine signal propagation shape the type-I  
890 interferon response. Mol Syst Biol. 2012;8(584):1–13.
- 891 36. Maiwald T, Schneider A, Busch H, Sahle S, Gretz N, Weiss TS, et al.  
892 Combining theoretical analysis and experimental data generation  
893 reveals IRF9 as a crucial factor for accelerating interferon- $\alpha$  induced  
894 early antiviral signalling. FEBS J. 2010;277(22):4741–54.

- 895 37. Moraga I, Harari D, Schreiber G, Uze G, Pellegrini S. Receptor Density  
896 Is Key to the Alpha2/Beta Interferon Differential Activities. *Mol Cell Biol.*  
897 2009;29(17):4778–87.
- 898 38. Levin D, Harari D, Schreiber G. Stochastic Receptor Expression  
899 Determines Cell Fate upon Interferon Treatment. *Mol Cell Biol.*  
900 2011;31(16):3252–66.
- 901 39. Kalie E, Jaitin DA, Abramovich R, Schreiber G. An interferon ??2  
902 mutant optimized by phage display for IFNAR1 binding confers  
903 specifically enhanced antitumor activities. *J Biol Chem.*  
904 2007;282(15):11602–11.
- 905 40. Kalie E, Jaitin DA, Podoplelova Y, Piehler J, Schreiber G. The stability  
906 of the ternary interferon-receptor complex rather than the affinity to the  
907 individual subunits dictates differential biological activities. *J Biol Chem.*  
908 2008;283(47):32925–36.
- 909 41. Lavoie TB, Kalie E, Crisafulli-Cabatu S, Abramovich R, DiGioia G,  
910 Moolchan K, et al. Binding and activity of all human alpha interferon  
911 subtypes. *Cytokine.* 2011;56(2):282–9.
- 912 42. Suresh Kumar KG, Barriere H, Carbone CJ, Liu J, Swaminathan G, Xu  
913 P, et al. Site-specific ubiquitination exposes a linear motif to promote  
914 interferon- $\alpha$  receptor endocytosis. *J Cell Biol.* 2007;179(5):935–50.
- 915 43. Kumar KGS, Tang W, Ravindranath AK, Clark WA, Croze E, Fuchs SY.  
916 SCF HOS ubiquitin ligase mediates the ligand-induced down-regulation  
917 of the interferon-  $\alpha$  receptor. 2003;22(20).
- 918 44. Marijanovic Z, Ragimbeau J, Kumar KGS, Fuchs SY, Pellegrini S. TYK2  
919 activity promotes ligand-induced IFNAR1 proteolysis. *Biochem J.*

- 920           2006;397(1):31–8.
- 921   45.   Weerd NA De, Samarajiwa SA, Hertzog PJ. Type I Interferon  
922           Receptors : Biochemistry and Biological. J Biol Chem.  
923           2007;282(28):20053–7.
- 924   46.   Myers MP, Andersen JN, Cheng A, Tremblay ML, Horvath CM, Parisien  
925           JP, et al. TYK2 and JAK2 Are Substrates of Protein-tyrosine  
926           Phosphatase 1B. J Biol Chem. 2001;276(51):47771–4.
- 927   47.   Simoncic PD, Lee-loy A, Barber DL, Tremblay ML, Mcglade CJ. The T  
928           Cell Protein Tyrosine Phosphatase Is a Negative Regulator of Janus  
929           Family Kinases 1 and 3. Curr Biol. 2002;12(2):446–53.
- 930   48.   Piganis RAR, De Weerd NA, Gould JA, Schindler CW, Mansell A,  
931           Nicholson SE, et al. Suppressor of Cytokine Signaling (SOCS) 1 inhibits  
932           type I interferon (IFN) signaling via the interferon  $\alpha$  receptor (IFNAR1)-  
933           associated tyrosine kinase tyk2. J Biol Chem. 2011;286(39):33811–8.
- 934   49.   Malakhov MP, Malakhova OA, Il Kim K, Ritchie KJ, Zhang DE. UBP43  
935           (USP18) specifically removes ISG15 from conjugated proteins. J Biol  
936           Chem. 2002;277(12):9976–81.
- 937   50.   Malakhova OA, Kim K Il, Luo J, Zou W, Suresh KG, Fuchs SY, et al.  
938           UBP43 is a novel regulator of interferon signaling independent of its  
939           ISG15 isopeptidase activity. EMBO J. 2006;25(11):2358–67.
- 940   51.   Sarasin-Filipowicz M, Wang X, Yan M, Duong FHT, Poli V, Hilton DJ, et  
941           al. Alpha Interferon Induces Long-Lasting Refractoriness of JAK-STAT  
942           Signaling in the Mouse Liver through Induction of USP18/UBP43. Mol  
943           Cell Biol. 2009;29(17):4841–51.
- 944   52.   François-Newton V, de Freitas Almeida GM, Payelle-Brogard B,

- 945 Monneron D, Pichard-Garcia L, Piehler J, et al. USP18-based negative  
946 feedback control is induced by type I and type III interferons and  
947 specifically inactivates interferon  $\alpha$  response. PLoS One. 2011;6(7).
- 948 53. Makowska Z, Duong FHT, Trincucci G, Tough DF, Heim MH. Interferon-  
949  $\beta$  and interferon- $\lambda$  signaling is not affected by interferon-induced  
950 refractoriness to interferon- $\alpha$  in vivo. Hepatology. 2011;53(4):1171–80.
- 951 54. Liu B, Chen S, Guan Y, Chen L. Type III Interferon Induces Distinct  
952 SOCS1 Expression Pattern that Contributes to Delayed but Prolonged  
953 Activation of Jak/STAT Signaling Pathway: Implications for Treatment  
954 Non-Response in HCV Patients. PLoS One. 2015;10(7):e0133800.
- 955 55. Fan W, Xie S, Zhao X, Li N, Chang C, Li L, et al. IFN- $\lambda$ 4 desensitizes  
956 the response to IFN- $\alpha$  treatment in chronic hepatitis c through long-term  
957 induction of USP18. J Gen Virol. 2016;97(9):2210–20.
- 958 56. Blumer T, Coto-Llerena M, Duong FHT, Heim MH. SOCS1 is an  
959 inducible negative regulator of interferon  $\lambda$  (IFN- $\lambda$ )-induced gene  
960 expression in vivo. J Biol Chem. 2017;292(43):17928–38.
- 961 57. Obajemu AA, Rao N, Dilley KA, Vargas JM, Sheikh F, Donnelly RP, et  
962 al. IFN- $\lambda$ 4 Attenuates Antiviral Responses by Enhancing Negative  
963 Regulation of IFN Signaling. J Immunol. 2017;ji1700807.
- 964 58. Uddin S, Sassano A, Deb DK, Verma A, Majchrzak B, Rahman A, et al.  
965 Protein kinase C- $\delta$  (PKC- $\delta$ ) is activated by type I interferons and  
966 mediates phosphorylation of Stat1 on serine 727. J Biol Chem.  
967 2002;277(17):14408–16.
- 968 59. Wieczorek M, Ginter T, Brand P, Heinzl T, Kra OH. Cytokine & Growth  
969 Factor Reviews Acetylation modulates the STAT signaling code.



- 970 2012;23:293–305.
- 971 60. Song L, Bhattacharya S, Yunus AA, Lima CD, Schindler C. Stat1 and  
972 SUMO modification. *Blood*. 2017;108(10):3237–45.
- 973 61. Platanias LC, Fish EN. Signaling pathways activated by interferons. *Exp*  
974 *Hematol*. 1999;27:1583–92.
- 975 62. Platanias LC. Mechanisms of type-I- and type-II-interferon-mediated  
976 signalling. *Nat Rev Immunol*. 2005;5(5):375–86.
- 977 63. Lekmine F, Sassano A, Uddin S, Majchrzak B, Miura O, Druker BJ, et  
978 al. The CrkL Adapter Protein Is Required for Type I Interferon-  
979 Dependent Gene Transcription and Activation of the Small G-Protein  
980 Rap1. *Biochem Biophys Res Commun*. 2002;750:744–50.
- 981 64. Uddin S, Majchrzak B, Woodson J, Arunkumar P, Alsayed Y, Pine R, et  
982 al. Activation of the p38 mitogen-activated protein kinase by type I  
983 interferons. *J Biol Chem*. 1999;274(42):30127–31.
- 984 65. Brand S, Beigel F, Olszak T, Zitzmann K, Eichhorst ST, Otte J-M, et al.  
985 IL-28A and IL-29 mediate antiproliferative and antiviral signals in  
986 intestinal epithelial cells and murine CMV infection increases colonic IL-  
987 28A expression. *Am J Physiol Gastrointest Liver Physiol*.  
988 2005;289(5):G960–8.
- 989 66. Alase A a, El-Sherbiny YM, Vital EM, Tobin DJ, Turner N a, Wittmann  
990 M. IFN $\lambda$  Stimulates MxA Production in Human Dermal Fibroblasts via a  
991 MAPK-Dependent STAT1-Independent Mechanism. *J Invest Dermatol*.  
992 2015;(August):1–29.
- 993 67. Selvakumar TA, Bhushal S, Kalinke U, Wirth D, Hauser H, Köster M, et  
994 al. Identification of a predominantly interferon- $\lambda$ -induced transcriptional

- 995 profile in murine intestinal epithelial cells. *Front Immunol.* 2017;8(OCT).
- 996 68. Andreakos E, Salagianni M, Galani IE, Koltsida O. Interferon- $\lambda$ s: Front-  
997 line guardians of immunity and homeostasis in the respiratory tract.  
998 *Front Immunol.* 2017;8(SEP):1–7.
- 999 69. Chiriac MT, Buchen B, Wandersee A, Hundorfean G, Günther C,  
1000 Bourjau Y, et al. Activation of Epithelial Signal Transducer and Activator  
1001 of Transcription 1 by Interleukin 28 Controls Mucosal Healing in Mice  
1002 With Colitis and Is Increased in Mucosa of Patients With Inflammatory  
1003 Bowel Disease. *Gastroenterology.* 2017;153(1):123–138.e8.
- 1004 70. Raue A, Kreutz C, Maiwald T, Bachmann J, Schilling M, Klingmüller U,  
1005 et al. Structural and practical identifiability analysis of partially observed  
1006 dynamical models by exploiting the profile likelihood. *Bioinformatics.*  
1007 2009;25(15):1923–9.
- 1008 71. Seber GAF, Wild CJ. *Nonlinear Regression.* John Wiley & Sons.  
1009 2003.775 p.

1010

## 1011 **Figure Legends**

1012 **Fig 1. Kinetics of type I and type III IFN-mediated antiviral activities in**  
1013 **human mini gut-organoids.** (A-B) Colon organoids were pre-treated with the  
1014 indicated concentrations of type I IFN ( $\beta$ ) or type III IFN ( $\lambda$ 1–3) for 2.5 h prior  
1015 to infection with vesicular stomatitis virus (VSV) expressing Firefly luciferase  
1016 (VSV-Luc) using a multiplicity of infection (MOI) of 1. Viral replication was  
1017 assayed by measuring the luciferase activity. (A) The relative antiviral  
1018 protection is expressed as a percentage of total protection in VSV-infected  
1019 organoids or (B) as the EC90 corresponding to the concentration of type I IFN

1020 ( $\beta$ ) or type III IFN ( $\lambda 1-3$ ) resulting in 90% inhibition (10% infection) of viral  
1021 replication. (C-D) Colon organoids were treated with type I IFN ( $\beta$ ) (2,000  
1022 RU/mL equivalent 0.33 nM) or type III IFN ( $\lambda 1-3$ ) (100ng/mL each or total 300  
1023 ng/mL equivalent 13.7 nM) for different times prior to infection with VSV-Luc.  
1024 Viral replication was assayed by measuring luciferase activity. (C) The relative  
1025 VSV infection is expressed as the percentage of the luciferase activity present  
1026 in VSV-infected organoids without IFN treatment (set to 100). (D) Pre-  
1027 incubation time of type I IFN ( $\beta$ ) or type III IFN ( $\lambda 1-3$ ) required to inhibit VSV  
1028 infection to 10% (90% inhibition). (E-F) Same as (C-D), except colon  
1029 organoids were treated at the indicated times post-infection with VSV-Luc. (F)  
1030 Delayed-time post-infection for type I IFN ( $\beta$ ) or type III IFN ( $\lambda 1-3$ ) to still  
1031 inhibit VSV infection to 90% (10% inhibition). Data in (A-F) represent the  
1032 mean values of two independent experiments. Error bars indicate the SD.  
1033 \* $P < 0.05$ , \*\* $P < 0.01$ , ns, not significant (unpaired t-test).

1034

1035 **Fig 2. Type III IFNs have a lower transcriptional activity compared to**  
1036 **type I IFNs.** (A-B) Human colon organoids were stimulated with indicated  
1037 concentrations of type I ( $\beta$ ) or III IFN ( $\lambda 1-3$ ) for different times and the  
1038 transcript levels of the ISGs IFIT1 and Viperin were analyzed by qRT-PCR.  
1039 Data are normalized to TBP and HPRT1 and are expressed relative to  
1040 untreated samples at each time point. A representative experiment with  
1041 technical triplicates, out of three independent experiments is shown. Mean  
1042 values and SD are shown. (C) Colon organoids were treated with type I IFN  
1043 ( $\beta$ ) (2,000 RU/mL equivalent 0.33 nM) or type III IFN ( $\lambda 1-3$ ) (300 ng/mL  
1044 equivalent 13.7 nM) for the indicated times and identification of the IFN-

1045 induced ISGs was performed by qRT-PCR. A total of 65 out of 132 ISGs  
1046 tested were found to be significantly induced more than 2-fold compared with  
1047 a baseline (mean of untreated controls at the particular time points) for at  
1048 least one time point by at least one IFN treatment. Data are normalized to  
1049 TBP and HPRT1 and visualized in a heatmap using R after sorting the fold  
1050 change of expression in response to type I IFN ( $\beta$ ) in decreasing order. (D)  
1051 Comparison of expression values ( $\log_2$  (Fold Change)) for all genes induced  
1052 at the indicated times with type I IFN ( $\beta$ ) versus type III IFN ( $\lambda 1-3$ ). Solid line  
1053 indicates equivalent expression.

1054

1055 **Fig 3. Type III IFNs present delayed transcriptional activity compared to**  
1056 **type I IFNs.** (A-D) Human colon organoids were treated with type I IFN ( $\beta$ )  
1057 (2,000 RU/mL equivalent 0.33 nM) or type III IFN ( $\lambda 1-3$ ) (300 ng/mL  
1058 equivalent 13.7 nM) for 3, 6, 12 or 24 hours and the kinetic pattern of  
1059 expression of the 65 significantly up-regulated ISGs were analyzed by qRT-  
1060 PCR in triplicates. Data are normalized to TBP and HPRT1 and are  
1061 expressed relative to untreated cells at each time point. Hierarchical clustering  
1062 analysis of these genes produced four distinct temporal expression patterns  
1063 (Groups 1-4) based on the time-point of the maximum induction in response  
1064 to type I IFN ( $\beta$ ) or type III IFN ( $\lambda 1-3$ ). Color codes have been used to  
1065 visualize the induction peak per group. (A-B) Gray lines show the normalized  
1066 kinetic expression of each gene for each group upon treatment with (A) type I  
1067 IFN ( $\beta$ ) or (B) type III IFN ( $\lambda 1-3$ ). The colored lines are the average of the  
1068 kinetic profiles for the genes of each group. (C) Gene expression heat map  
1069 showing the genes clustered in their respective temporal expression patterns

1070 groups in response to type I IFN ( $\beta$ ) or type III IFN ( $\lambda 1-3$ ). The genes per  
1071 group are sorted in decreasing order on the basis of their fold change of  
1072 expression in response to type I IFN ( $\beta$ ) or type III IFN ( $\lambda 1-3$ ) and only  
1073 showing the highest expressed values within the temporal groups omitting all  
1074 other values for visualization. (D) Number of genes belonging to each group.  
1075

1076 **Fig 4. Validation of the unique kinetic patterns of ISG expression upon**  
1077 **type I versus type III IFN treatment.** (A-D) Human colon organoids were  
1078 stimulated with increasing concentrations of type I IFN ( $\beta$ ) or III IFN ( $\lambda 1-3$ ) for  
1079 indicated times and the kinetic pattern of expression of one representative  
1080 ISG from each temporal expression patterns groups 1-4 was analyzed by  
1081 qRT-PCR, (left column) type I IFN ( $\beta$ ), (right column) type III IFN ( $\lambda 1-3$ )  
1082 treated organoids. Data are normalized to HPRT1 and are expressed relative  
1083 to untreated cells at each time point. A representative experiment with  
1084 technical triplicates. Mean values and SD are shown.

1085  
1086 **Fig 5. Mathematical modeling of type I and type III IFN responses.** (A)  
1087 Scheme of the mathematical model. IFNs bind to their cognate receptors and  
1088 activate them; all molecules are also subject to degradation ( $\emptyset$ ). Active  
1089 receptors mediate STAT phosphorylation while phosphorylated STAT (p-  
1090 STAT) drives ISG expression. ISGs may include negative feedback regulator  
1091 of STAT activation. Dashed lines indicate the potential sources of difference  
1092 between the two pathways. Red dashed lines show the sources of the  
1093 difference between the two pathways implemented in the best-fitting model.  
1094 (B) Model selection. Models fitted to the experimental data were ranked using

1095 the Akaike information criterion corrected for small sample size (AICc) and the  
1096 AICc weight, as a measure of support for the given model by the data. (C-D)  
1097 The best-fitting model M3 reproduces the Viperin expression dynamics upon  
1098 treatment with different concentrations of (C) type I IFN and (D) type III IFN  
1099 (see Sup Fig 3A-B for experimental data). In (C) and (D), the solid lines  
1100 represent the best fits and the shaded areas are 95% confidence intervals. (E)  
1101 Simulation of the maximum Viperin induction upon treatment with equal  
1102 concentrations of type I IFN or type III IFN.

1103

1104 **Fig 6. Overexpression of type I and type III IFN receptor increases the**  
1105 **transcriptional activity of both cytokines.** (A-F) Wild-type T84 cells were  
1106 transduced with rIFNAR1 or rIFNLR1 to create stable lines overexpressing  
1107 either IFN receptors. (A-B) T84 wild-type cells (WT) and T84 cells  
1108 overexpressing rIFNAR1 (WT+rIFNAR1) were treated with type I IFN ( $\beta$ )  
1109 (2,000 RU/mL equivalent 0.33 nM) or type III IFN ( $\lambda 1-3$ ) (300 ng/mL  
1110 equivalent 13.7 nM) for 1h and IFN signaling was measured by  
1111 immunoblotting for pSTAT1 Y701. Actin was used as a loading control. A  
1112 representative immunoblot out of three independent experiments is shown.  
1113 (C-D) T84 wild type cells (WT) and T84 cells overexpressing rIFNAR1  
1114 (WT+rIFNAR1) were treated with increasing concentrations of type I IFN ( $\beta$ )  
1115 for 12 hours or type III IFN ( $\lambda 1-3$ ) for 24 hours and the transcript levels of the  
1116 ISGs IFIT1 and VIPERIN were analyzed by qRT-PCR. Data are normalized to  
1117 HPRT1 and are expressed relative to untreated cells at each time point. (E-H)  
1118 Same as (A-D), except T84 cells overexpressing rIFNLR1 (WT+rIFNLR1) were  
1119 used. The mean value obtained from three independent experiments is

1120 shown. Error bars indicate the SD. \* $P < 0.05$ , \*\* $P < 0.01$ , \*\*\* $P < 0.001$ , \*\*\*\* $P <$   
1121  $0.0001$ , ns, not significant (unpaired t-test).

1122

1123 **Fig 7. Expression kinetics of ISGs are independent of the IFN receptor**  
1124 **levels.** (A-D) Wild-type T84 cells were transduced with rIFNAR1 or rIFNLR1  
1125 to create stable lines overexpressing either receptors. (blue panels) T84 wild-  
1126 type cells (WT) and T84 cells overexpressing the IFNAR1 (WT+rIFNAR1)  
1127 were treated with increasing concentrations of type I IFN ( $\beta$ ) for the indicated  
1128 times and the kinetic pattern of expression of one representative ISG from  
1129 each temporal expression patterns groups 1-4 was analyzed by qRT-PCR.  
1130 Data are normalized to HPRT1 and are expressed relative to untreated cells  
1131 at each time point. (red panels) Same as (blue panels), except T84 cells  
1132 overexpressing the IFNLR1 (WT+IFNLR1) were used and treated with  
1133 increasing concentrations of type III IFN ( $\lambda 1-3$ ). A representative experiment  
1134 with technical triplicates, out of three independent experiments is shown.  
1135 Mean values and SD are shown.

1136

1137 **Fig 8. Type III IFN mediated expression kinetics of ISGs are independent**  
1138 **of differential levels of IFNLR1 receptor.** Wild-type T84 cells were  
1139 transduced with rIFNLR1-GFP to create a stable line overexpressing IFNLR1  
1140 tagged with GFP. (A) WT cells overexpressing IFNLR1-GFP (WT+IFNLR1-  
1141 GFP) from the same population were separated by cell sorting into three  
1142 populations: non (neg)-, low- and high-expressing GFP cells. Gates were  
1143 created based on the auto-fluorescence of WT cells. (B) WT and  
1144 WT+IFNLR1-GFP cells were treated with type III IFN ( $\lambda 1-3$ ) (300 ng/mL

1145 equivalent 13.7 nM) for 3, 6, 12 and 24 hours prior to sorting in neg-, low- and  
1146 high-expressing IFNLR1-GFP cells. The kinetic pattern of expression of one  
1147 representative ISG from each temporal expression patterns groups 1-4 was  
1148 analyzed by qRT-PCR in each sorted population. Data are normalized to  
1149 HPRT1 and are expressed relative to untreated cells at each time point. A  
1150 representative experiment with technical triplicates, out of two independent  
1151 experiments is shown. Mean values and SD are shown.

1152

1153

## 1154 **Supporting Information Legends**

1155 **Sup Fig 1. Kinetics of type I and type III IFN-mediated antiviral activities**  
1156 **in intestinal organoids.** (A-B) Intestinal organoids were pre-treated with the  
1157 indicated concentrations of type I IFN ( $\beta$ ) or type III IFN ( $\lambda 1-3$ ) for 2.5 h prior  
1158 to infection with VSV-Luc using a multiplicity of infection (MOI) of 1. Viral  
1159 replication was assayed by measuring the luciferase activity. (A) The relative  
1160 antiviral protection is expressed as a percentage of total protection in VSV-  
1161 infected organoids or (B) as the EC90 corresponding to the concentration of  
1162 type I IFN ( $\beta$ ) or type III IFN ( $\lambda 1-3$ ) resulting in 90% inhibition (10% infection)  
1163 of viral replication. (C-D) Intestinal organoids were treated with type I IFN ( $\beta$ )  
1164 (2,000 RU/mL equivalent 0.33 nM) or type III IFN ( $\lambda 1-3$ ) (100ng/mL each or  
1165 total 300 ng/mL equivalent 13.7 nM) for different times prior to infection with  
1166 VSV-Luc. Viral replication was assayed by measuring luciferase activity. (C)  
1167 The relative VSV infection is expressed as the percentage of the luciferase  
1168 activity present in VSV-infected organoids without IFN treatment (set to 100).  
1169 (D) Pre-incubation time of type I IFN ( $\beta$ ) or type III IFN ( $\lambda 1-3$ ) required to



1170 inhibit VSV infection to 10% (90% inhibition). (E-F) Same as (C-D), except  
1171 intestinal organoids were treated at the indicated times post-infection with  
1172 VSV-Luc. (F) Delayed-time post-infection for type I IFN ( $\beta$ ) or type III IFN  
1173 ( $\lambda 1-3$ ) to still inhibit VSV infection to 90% (10% inhibition). Data represent the  
1174 mean values of two independent experiments with intestinal organoids  
1175 generated from two different donors. Error bars indicate the SD. \* $P < 0.05$ , \*\* $P <$   
1176  $0.01$ , \*\*\* $P < 0.001$ , ns, not significant (unpaired t-test).

1177

1178 **Sup Fig 2. Kinetics of type I and type III IFN-mediated antiviral activities**  
1179 **in human intestinal epithelial cells.** (A-B) T84 cells were pre-treated with  
1180 the indicated concentrations of type I IFN ( $\beta$ ) or type III IFN ( $\lambda 1-3$ ) for 2.5 h  
1181 prior to infection with vesicular stomatitis virus (VSV) expressing Firefly  
1182 luciferase (VSV-Luc) using a multiplicity of infection (MOI) of 1. Viral  
1183 replication was assayed by measuring the luciferase activity. (A) The relative  
1184 antiviral protection is expressed as a percentage of total protection in VSV-  
1185 infected cells or (B) as the EC90 corresponding to the concentration of type I  
1186 IFN ( $\beta$ ) or type III IFN ( $\lambda 1-3$ ) resulting in 90% inhibition (10% infection) of viral  
1187 replication. (C-D) T84 cells were treated with type I IFN ( $\beta$ ) (2,000 RU/mL  
1188 equivalent 0.33 nM) or type III IFN ( $\lambda 1-3$ ) (100ng/mL each or total 300 ng/mL  
1189 equivalent 13.7 nM) for different times prior to infection with VSV-Luc. Viral  
1190 replication was assayed by measuring luciferase activity. (C) The relative VSV  
1191 infection is expressed as the percentage of the luciferase activity present in  
1192 VSV-infected cells without IFN treatment (set to 100). (D) Pre-incubation time  
1193 of type I IFN ( $\beta$ ) or type III IFN ( $\lambda 1-3$ ) required to inhibit VSV infection to 10%  
1194 (90% inhibition). (E-F) Same as (C-D), except T84 cells were treated at the

1195 indicated times post-infection with VSV-Luc. (F) Delayed-time post-infection  
1196 for type I IFN ( $\beta$ ) or type III IFN ( $\lambda 1-3$ ) to still inhibit VSV infection to 90%  
1197 (10% inhibition). Data in (A–F) represent the mean values of three  
1198 independent experiments. Error bars indicate the SD. \* $P < 0.05$ , \*\* $P < 0.01$ , \*\*\* $P$   
1199  $< 0.001$ , \*\*\*\* $P < 0.0001$ , ns, not significant (unpaired t-test).

1200

1201 **Sup Fig 3. Type III IFNs have a lower transcriptional activity compared to**  
1202 **type I IFNs in human intestinal epithelial cells.** (A-B) T84 cells were  
1203 stimulated with indicated concentrations of type I ( $\beta$ ) or III IFN ( $\lambda 1-3$ ) for  
1204 different times and the transcript levels of the ISGs IFIT1 and Viperin were  
1205 analyzed by qRT-PCR. Data are normalized to TBP and HPRT1 and are  
1206 expressed relative to untreated cells at each time point. A representative  
1207 experiment with technical triplicates, out of three independent experiments is  
1208 shown. Mean values and SD are shown. (C-D) T84 cells were treated with  
1209 type I IFN ( $\beta$ ) (2,000 RU/mL equivalent 0.33 nM) or type III IFN ( $\lambda 1-3$ ) (300  
1210 ng/mL equivalent 13.7 nM) for the indicated times and identification of the  
1211 IFN-induced ISGs was performed by qRT-PCR. A total of 70 out of 132 ISGs  
1212 tested were found to be significantly induced more than 2-fold compared with  
1213 a baseline (mean of untreated controls at the particular time points) for at  
1214 least one time point by at least one IFN treatment. Data are normalized to  
1215 TBP and HPRT1. (C) Comparison of expression values ( $\log_2$  (Fold Change))  
1216 for all genes induced at the indicated times with type I IFN ( $\beta$ ) versus type III  
1217 IFN ( $\lambda 1-3$ ). Solid line indicates equivalent expression. (D) Hierarchical  
1218 clustering analysis of these genes produced four distinct temporal expression  
1219 patterns (Groups 1-4) based on the time-point of the maximum induction in

1220 response to type I IFN ( $\beta$ ) or type III IFN ( $\lambda 1-3$ ). Color codes have been used  
1221 to visualize the induction peak per group. Gene expression heat map showing  
1222 the genes clustered in their respective temporal expression patterns groups in  
1223 response to type I IFN ( $\beta$ ) or type III IFN ( $\lambda 1-3$ ). The genes per group are  
1224 sorted in decreasing order on the basis of their fold change of expression in  
1225 response to type I IFN ( $\beta$ ) or type III IFN ( $\lambda 1-3$ ) and only showing the highest  
1226 expressed values within the temporal groups omitting all other values for  
1227 visualization.

1228

1229 **Sup Fig 4. Comparison of the transcriptional response between wild-**  
1230 **type IFN $\lambda 3$  and high affinity H11-IFN $\lambda 3$  variant.** (A-D) T84 cells were  
1231 stimulated with increasing concentrations of type III IFN ( $\lambda 3$ ) (WT-IFN $\lambda 3$ ) or  
1232 the high affinity IFN $\lambda 3$  variant (H11-IFN $\lambda 3$ ) for indicated times and the kinetic  
1233 of expression of one representative ISG from each temporal expression  
1234 groups 1-4 was analyzed by qRT-PCR, (left column) WT-IFN $\lambda 3$ , (right  
1235 column) H11-IFN $\lambda 3$  treated cells. Data are normalized to HPRT1 and are  
1236 expressed relative to untreated cells at each time point. A representative  
1237 experiment with technical triplicates. Mean values and SD are shown.

1238

1239 **Sup Fig 5. Analysis of mathematical model M3.** (A) Comparative simulation  
1240 of type I and type III IFN receptor complex activation. Cellular concentration of  
1241 the activated type I or type III IFN receptor complex, upon treatment with 0.1  
1242 nM of IFNs, are simulated using the calibrated model. (B) Profile likelihoods of  
1243 model parameters. The uncertainty of the estimated model parameters is  
1244 calculated using the profile likelihood method. The solid blue line is the

1245 change in the weighted sum of squared residuals ( $\Delta\chi^2$ ), the filled circle  
1246 indicates the optimum parameter value, and the solid red line indicates the  
1247 95% threshold calculated using the  $\chi^2$  distribution. (C) The 95% confidence  
1248 bounds of type I or type III IFN receptor complex inactivation rate constants  
1249 are calculated using the profile likelihood method. Our calculations show that  
1250 the type III IFN receptor complex inactivation rate constant ( $k_2$ ) is significantly  
1251 smaller than the corresponding rate constant for type I IFN receptor complex  
1252 ( $k_{11}$ ). (D-E) The mathematical model shows the effect of IFNAR1 (D) and  
1253 IFNLR1 (E) overexpression of up to 3-fold (3×IFNAR1 and 3×IFNLR1) on  
1254 Viperin activation upon treatment with representative concentrations of type I  
1255 IFN ( $\beta$ ) (0.1 nM) or type III IFN ( $\lambda 1-3$ ) (13.7 nM), respectively.

1256

1257 **Sup Fig 6. Expression levels of IFN receptors in T84 cells.** (A) T84 wild-  
1258 type cells, (B) T84 cells overexpressing rIFNAR1 (WT+rIFNAR1) and (C) T84  
1259 cells overexpressing rIFNLR1 (WT+rIFNLR1) were analyzed by qRT-PCR to  
1260 quantify the transcript levels of IFNAR1, IFNAR2, IFNLR1 and IL10RB  
1261 (IFNLR2). Data are normalized to HPRT1. The mean value obtained from  
1262 three independent experiments is shown. Error bars indicate the SD. \* $P < 0.05$ ,  
1263 \*\* $P < 0.01$ , \*\*\* $P < 0.001$ , \*\*\*\* $P < 0.0001$ , ns, not significant (unpaired t-test).

1264

1265 **Sup Fig 7. Type I and type III IFN receptors are functional when**  
1266 **overexpressed into cells.** (A-D) T84 IFNAR1<sup>-/-</sup> cells were rescued by stable  
1267 expression of a cleavage resistant mutant of rIFNAR1 (see methods for  
1268 details) (T84 IFNAR1<sup>-/-</sup> + rIFNAR1). (B-D) T84 IFNAR1<sup>-/-</sup>, T84 IFNAR1<sup>-/-</sup> +  
1269 rIFNAR1 cells and control T84 cells scramble gRNA (SCR) were pre-treated

1270 with type I IFN ( $\beta$ ) (2,000 RU/mL equivalent 0.33 nM) or type III IFN ( $\lambda 1-3$ )  
1271 (300 ng/mL equivalent 13.7 nM). (B) 2.5 h post-treatment, T84 cells were  
1272 infected with VSV-Luc (MOI = 1). Viral replication was assayed by measuring  
1273 the luciferase activity. For each sample luciferase activity was measured in  
1274 triplicates and is expressed as the percentage of the luciferase signal in VSV-  
1275 infected cells without IFN treatment (set to 100) for each cell lines. (C) 1h post  
1276 IFN treatment, IFN signaling was measured by immunoblotting for pSTAT1  
1277 Y701. Actin was used as a loading control. A representative immunoblot out  
1278 of three independent experiments is shown. (D) same as (B), except that  
1279 induction of IFN-stimulated genes was monitored by relative qRT-PCR  
1280 quantification of IFIT1 and Viperin at the indicated times post-IFN treatment.  
1281 (E-H) same as (A-D) except that T84 IFNLR1<sup>-/-</sup> were rescued by stable  
1282 expression of a cleavage resistant mutant of rIFNLR1 (T84 IFNLR1<sup>-/-</sup> +  
1283 rIFNLR1). Data were normalized to HPRT1 and are expressed relative to  
1284 untreated cells of each time point. The mean value obtained from three  
1285 independent experiments is shown. Error bars indicate the SD.

1286

1287 **Sup Fig 8. Establishment of an antiviral state in cells overexpressing the**  
1288 **IFN receptors and treated with IFNs.** (A-H) Wild-type T84 cells were  
1289 transduced with rIFNAR1 or rIFNLR1 to create stable lines overexpressing  
1290 either receptor. (A-D) T84 wild-type cells (WT) and T84 cells overexpressing  
1291 the IFNAR1 (WT+rIFNAR1) were treated with (A-B) type I IFN ( $\beta$ ) (2,000  
1292 RU/mL equivalent 0.33 nM) or (C-D) type III IFN ( $\lambda 1-3$ ) (100ng/mL each =300  
1293 ng/mL equivalent 13.7 nM) at the indicated times (A, C) prior to infection or (B,  
1294 D) post infection with VSV-Luc. Viral replication was assayed by measuring

1295 the luciferase activity. The time necessary to confer IECs an antiviral state  
1296 was addressed by measuring the impact of IFN treatment on viral replication.  
1297 For each sample luciferase activity was measured in triplicates and is  
1298 expressed relative to VSV-infected cells without IFN treatment (set to 100).  
1299 (E-H) same as (A-D), but T84 wild-type cells (WT) and T84 cells  
1300 overexpressing the IFNLR1 (WT+rIFNLR1) were treated with (E-F) type I IFN  
1301 ( $\beta$ ) (2,000 RU/mL equivalent 0.33 nM) or (G-H) type III IFN ( $\lambda 1-3$ ) (100ng/mL  
1302 each =300 ng/mL equivalent 13.7 nM) at the indicated times (E, G) prior to  
1303 infection or (F, H) post infection with VSV-Luc. Data represent the mean  
1304 values of three independent experiments. Error bars indicate the SD. \* $P < 0.05$ ,  
1305 \*\* $P < 0.01$ , ns, not significant (unpaired t-test).

1306

1307 **Sup Fig 9. Expression kinetics of ISGs are independent of the IFN**  
1308 **receptor levels.** (A-B) Wild-type T84 cells were transduced with rIFNAR1 or  
1309 rIFNLR1 to create stable lines overexpressing either receptors. (A) T84 wild-  
1310 type cells (WT) and T84 cells overexpressing the IFNAR1 (WT+rIFNAR1)  
1311 were treated with increasing concentrations of type I IFN ( $\beta$ ) for the indicated  
1312 times and the expression kinetics of the ISG VIPERIN were analyzed by qRT-  
1313 PCR. Data are normalized to HPRT1 and are expressed relative to untreated  
1314 cells at each time point. (B) Same as (A), except T84 cells overexpressing the  
1315 IFNLR1 (WT+IFNLR1) were used and treated with increasing concentrations  
1316 of type III IFN ( $\lambda 1-3$ ). A representative experiment with technical triplicates,  
1317 out of three independent experiments is shown. Mean values and SD are  
1318 shown. (C-D) The mathematical model predicts the effect of IFNAR1 and  
1319 IFNLR1 overexpression on Viperin activation upon treatment with different

1320 concentrations of type I IFN ( $\beta$ ) and type III IFN ( $\lambda 1-3$ ). The IFNAR1 and  
1321 IFNLR1 levels were increased  $\sim 2.6$  and  $\sim 1.5$  fold, respectively, while all other  
1322 parameters were held constant. The solid lines are the best fits and the  
1323 shaded areas are 95% confidence intervals. (D) The mathematical model  
1324 correctly predicts the IFNAR1 versus IFNLR1 overexpression, measured  
1325 experimentally by qRT-PCR.

1326

1327 **Sup Table 1. List of primers used in predesigned 384 well assay qRT-**  
1328 **PCR.** For the gene expression analysis of interferon stimulated genes (ISGs),  
1329 qRT-PCR was performed using a predesigned 384-well assay of type I IFN  
1330 response assaying the expression of ISGs. The Reference Sequence  
1331 (RefSeq) accession number is provided for each ISG tested.

1332

1333 **Sup Table 2. List of primer sequences used for qRT-PCR analysis.** The  
1334 expression of additional ISGs, transcriptional factors and housekeeping genes  
1335 was analyzed by qRT-PCR with the primer sets shown in this table.

1336

1337 **Sup Table 3. Mathematical formulation of the model.** The table lists all  
1338 differential equations explaining the dynamics of different biological species in  
1339 our model. Cell surface (Area) is calculated as,  $\text{Area} = (36 \cdot \pi)^{1/3} \cdot V_{\text{cell}}^{2/3}$ . Cell  
1340 volume ( $V_{\text{cell}}$ ) is assumed equal to  $2 \times 10^{-9}$  Liter. Brackets [ ] indicate the  
1341 concentration of the respective biological species.

1342

1343 **Sup Table 4. State variables and initial values.** Biological species  
1344 considered in the model (state variables) and their initial values are listed in  
1345 the table.

1346

1347 **Sup Table 5. Estimated parameter values.** The estimated value of the  
1348 model free parameters, their profile-likelihood based confidence bound and  
1349 their dimensions are explained in the table. All reaction rate constants of the  
1350 model,  $k_1$ - $k_9$ , are practically identifiable.

1351



A

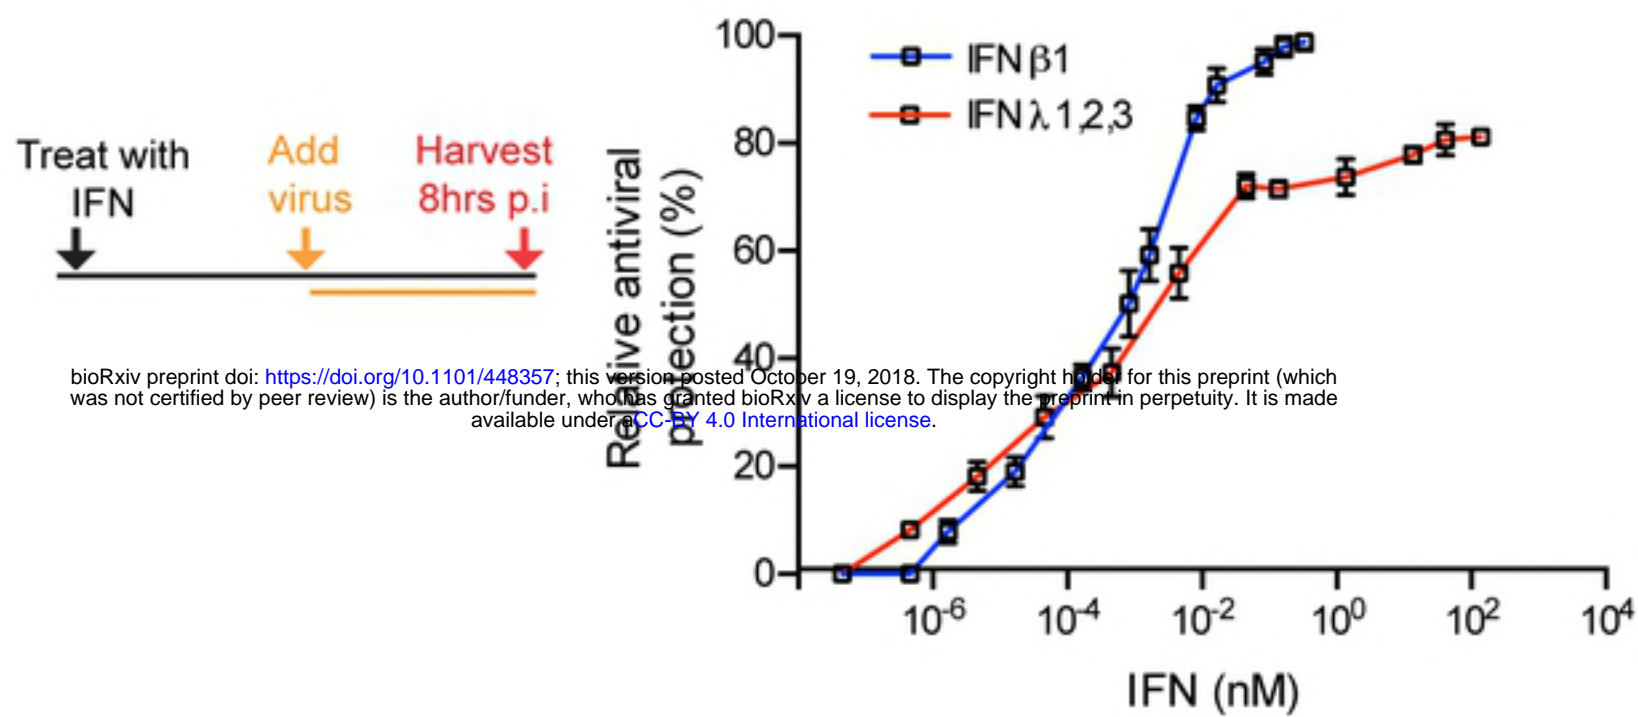

B

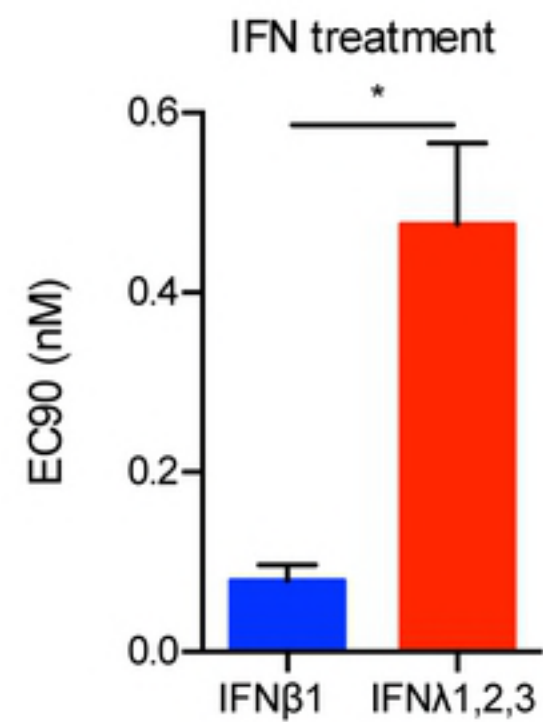

C

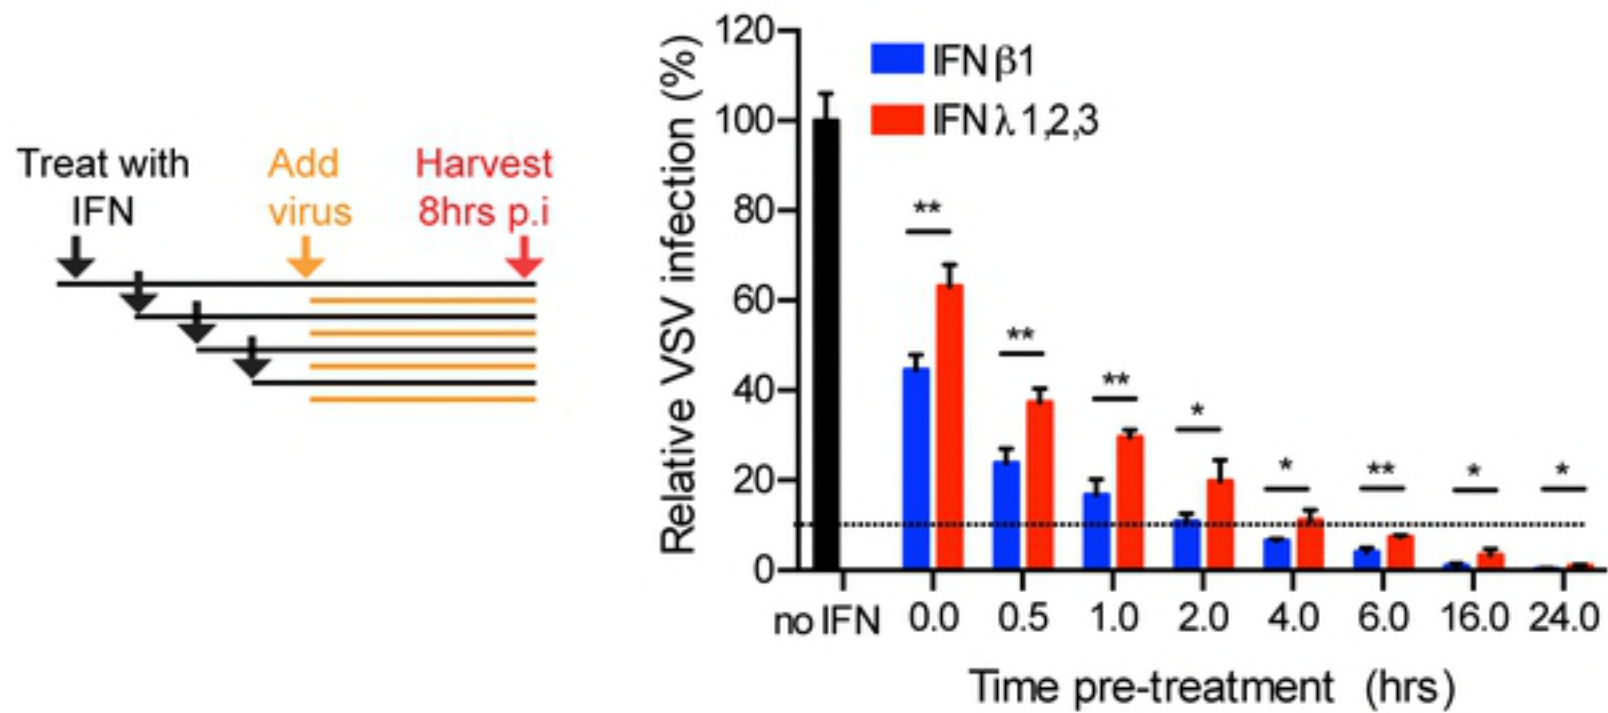

D

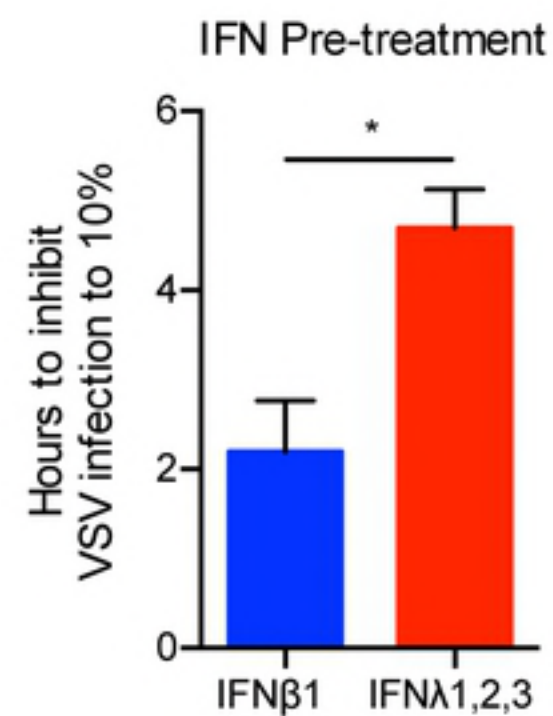

E

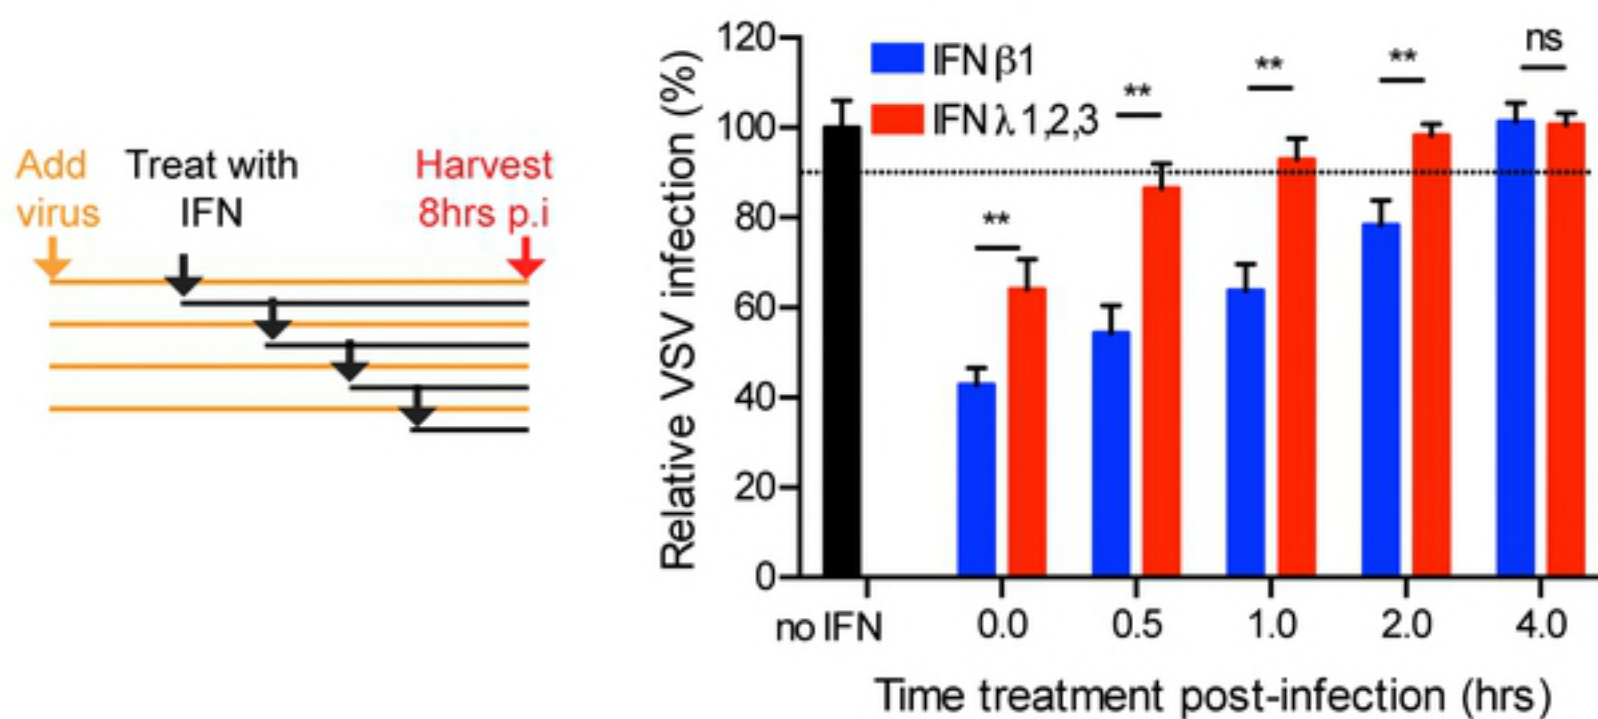

F

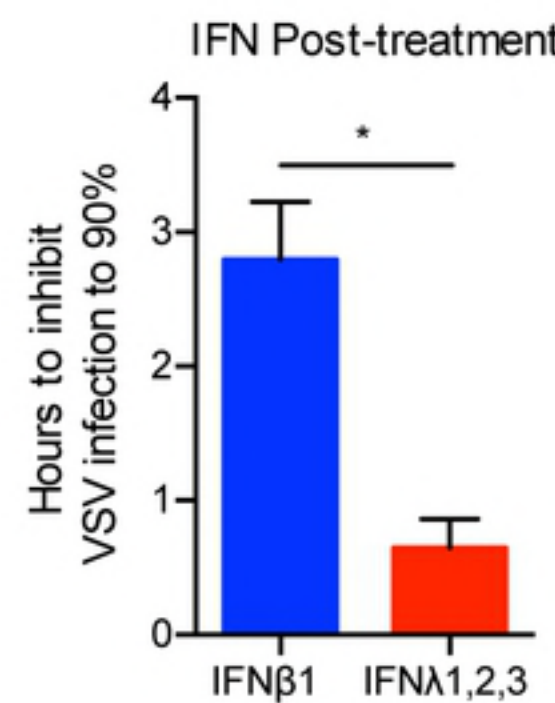

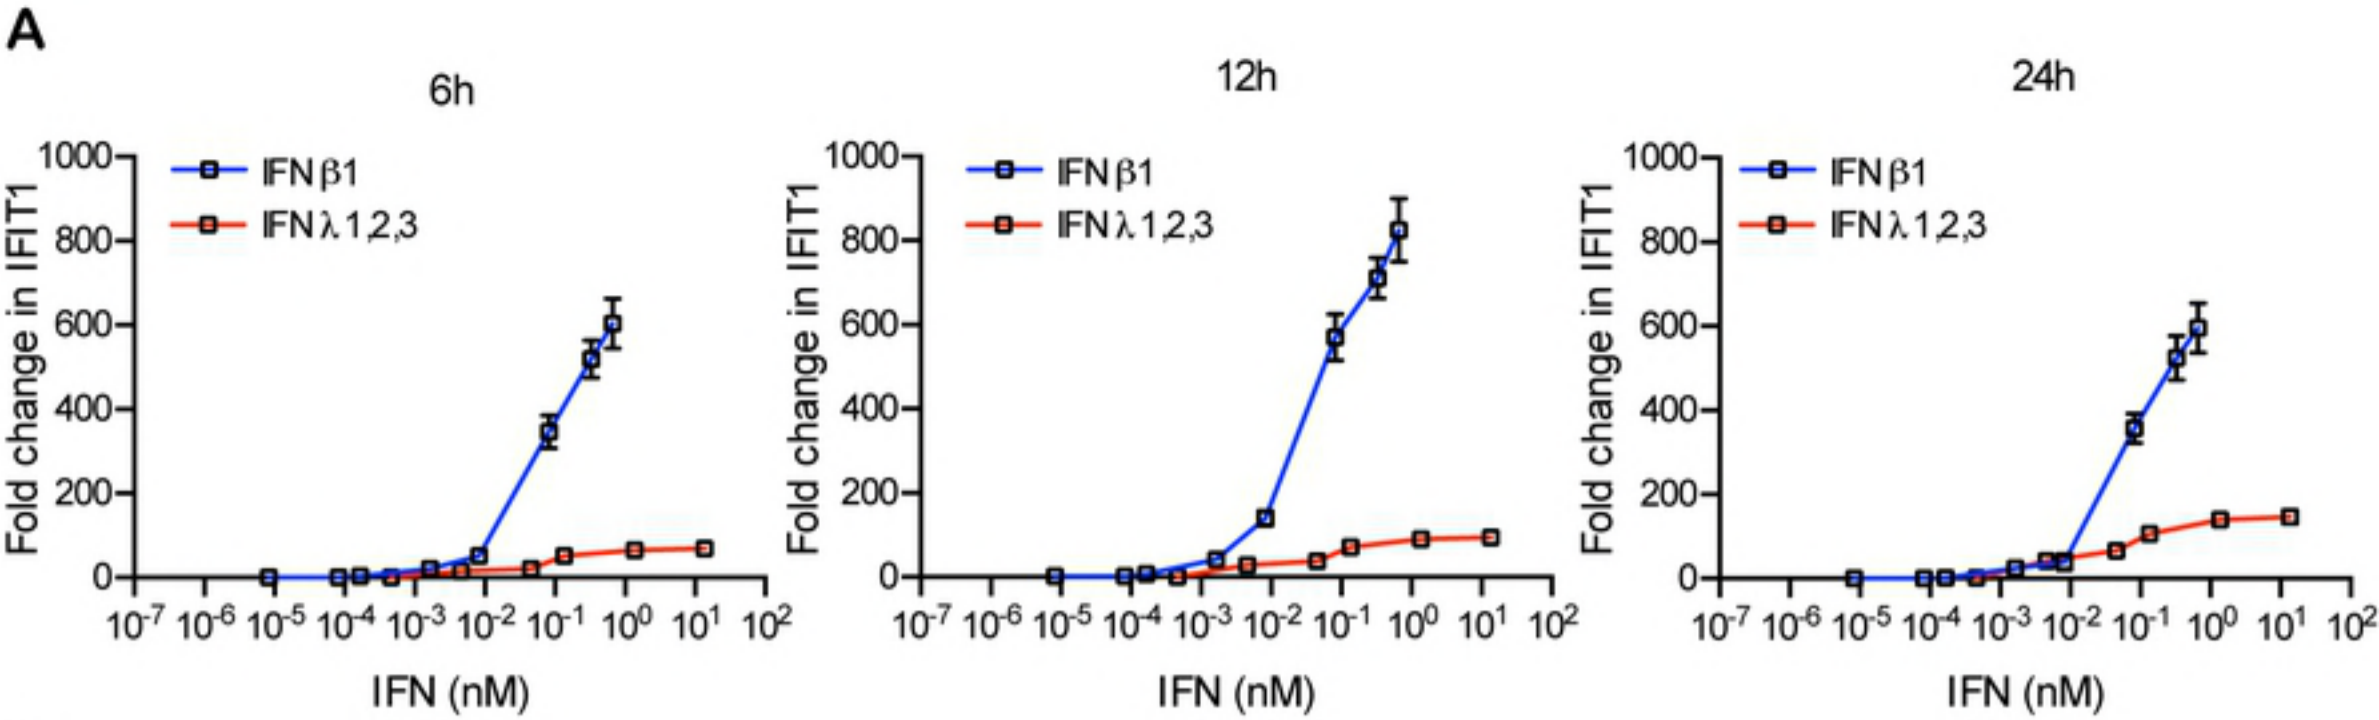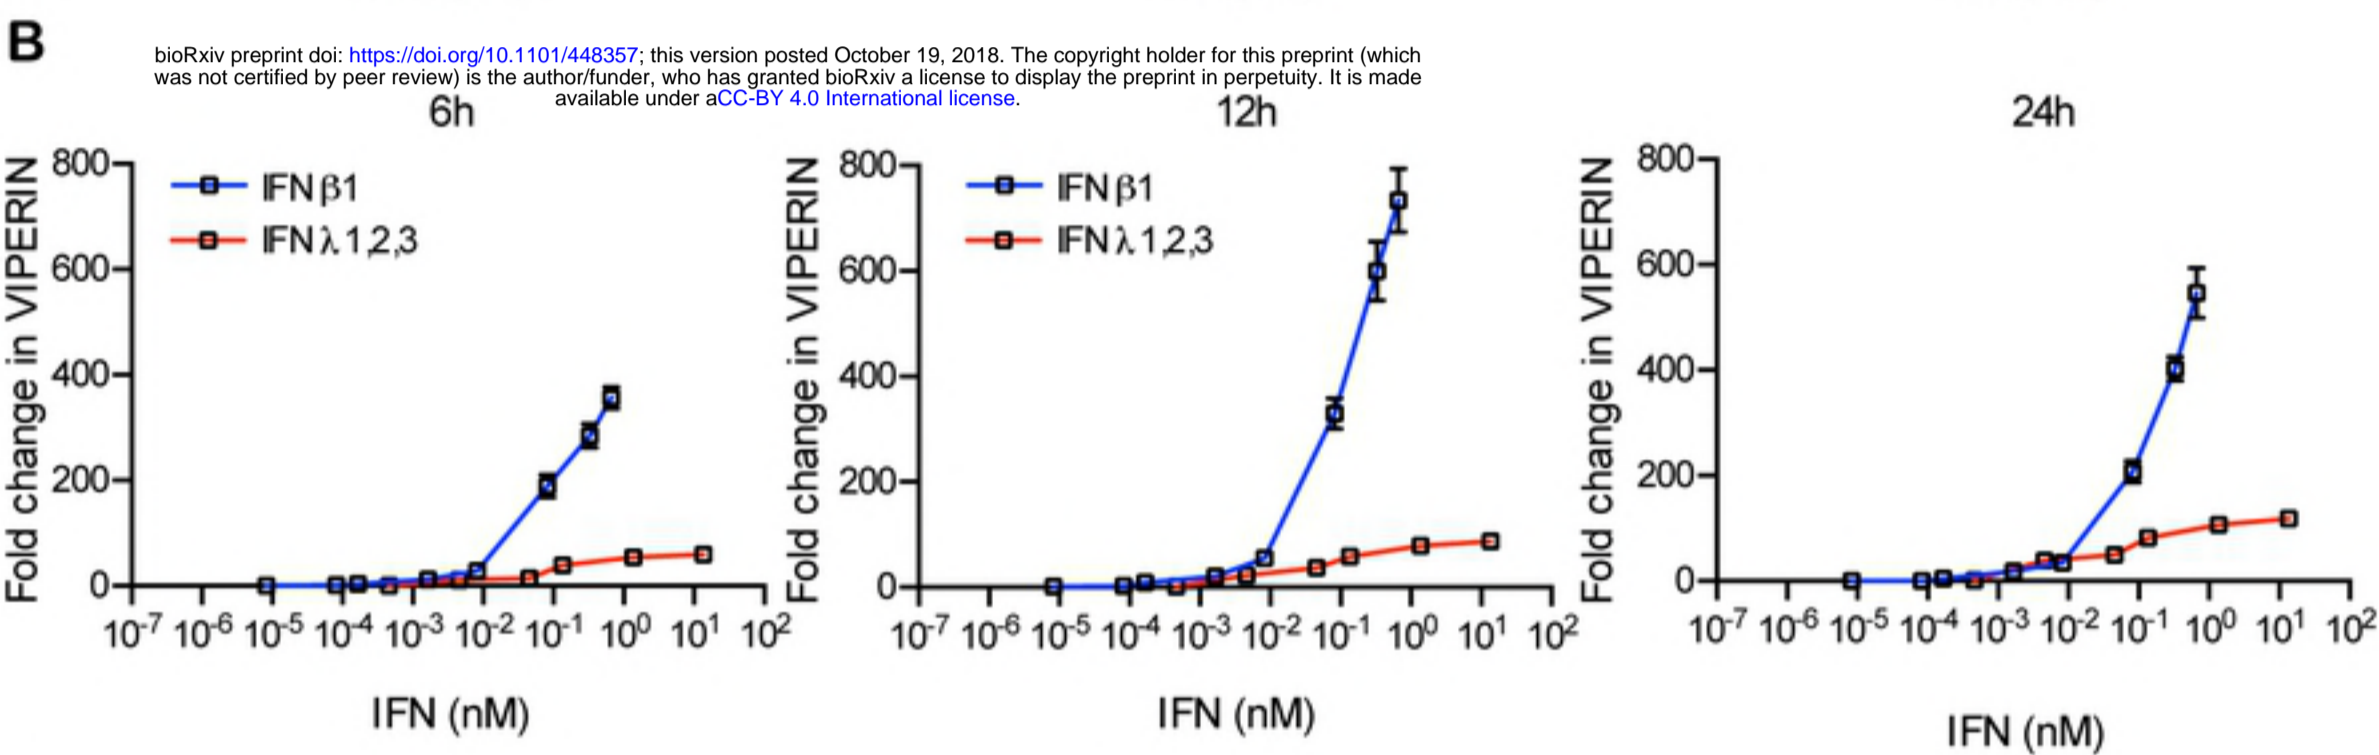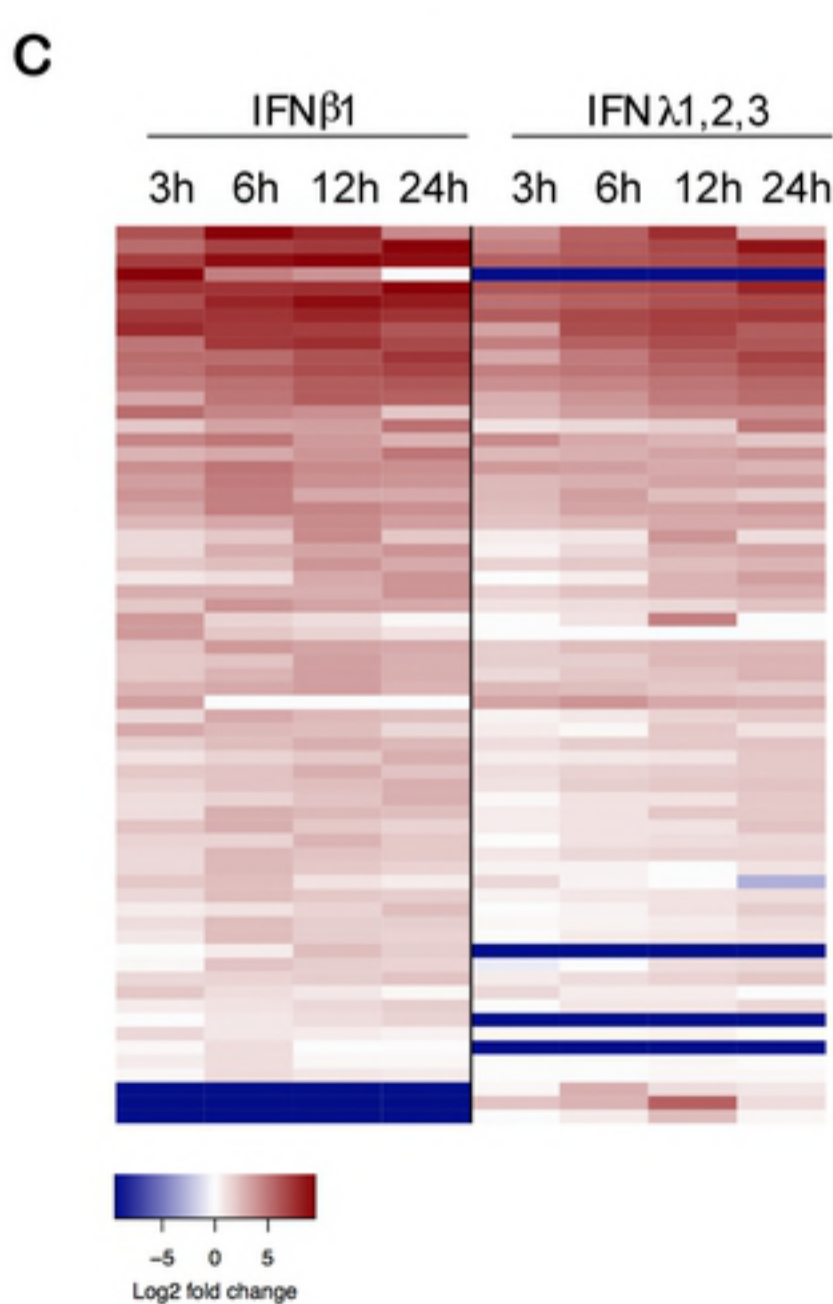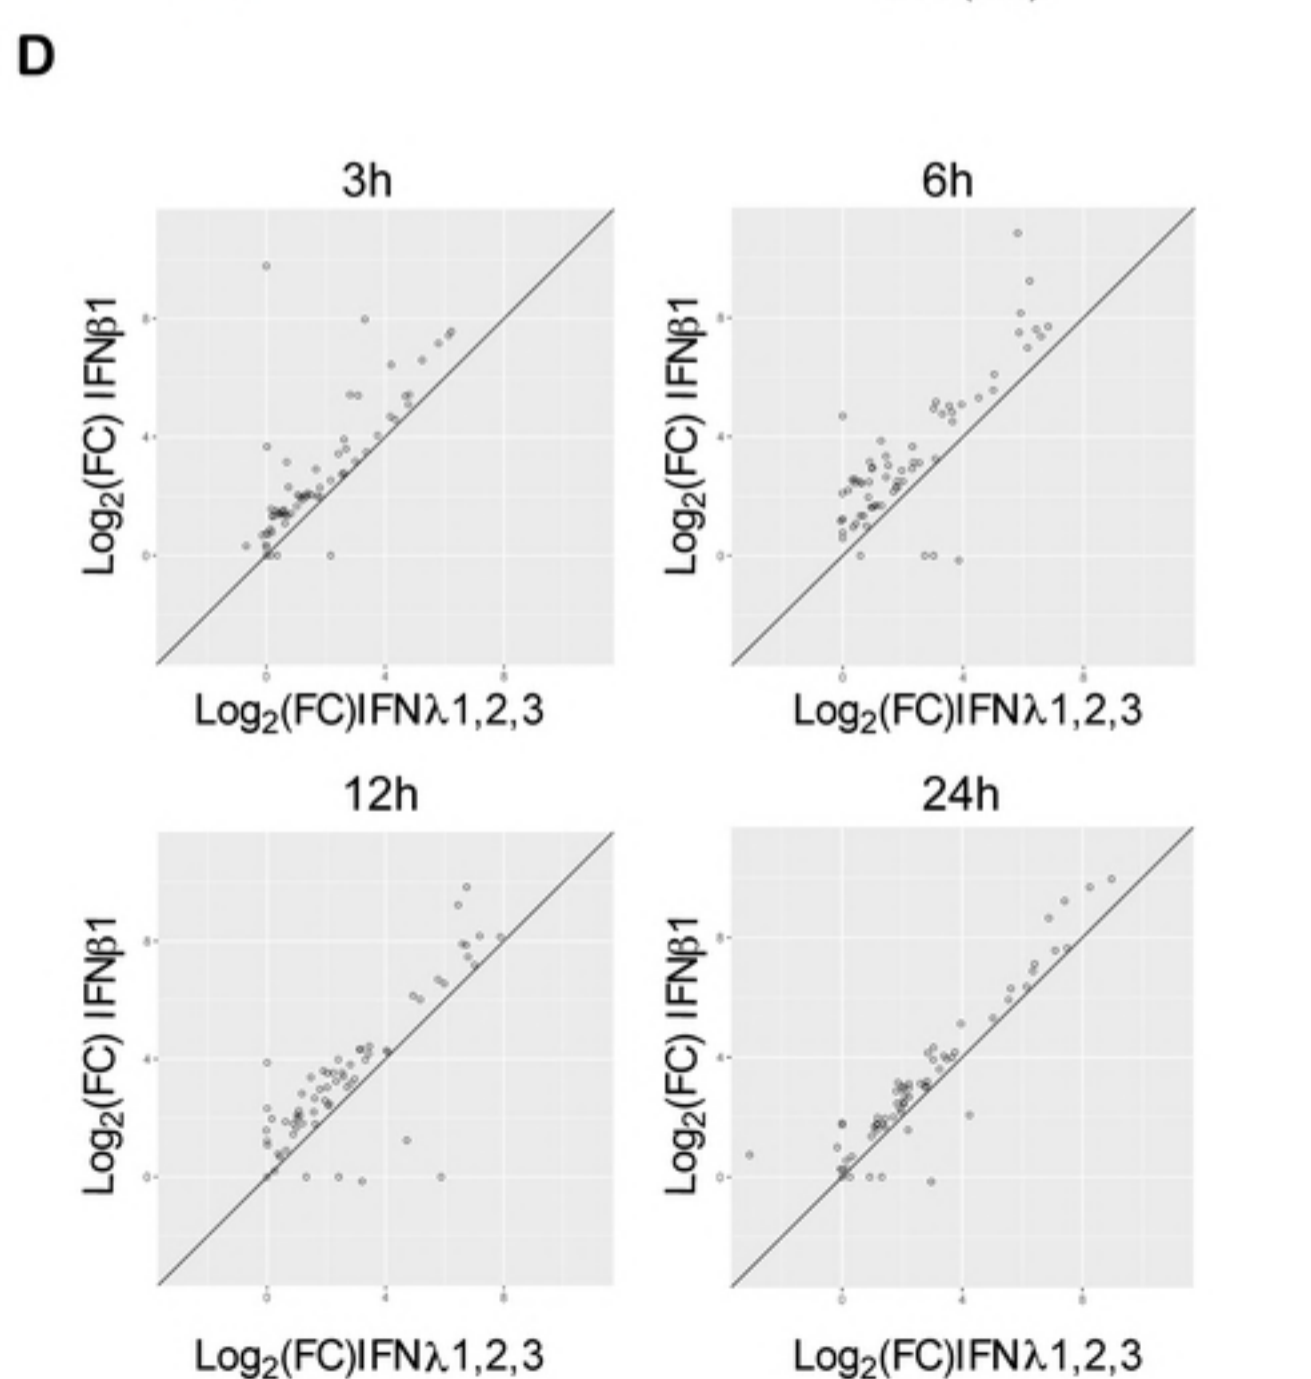

Fig2.tiff



A

IFN $\beta$ 1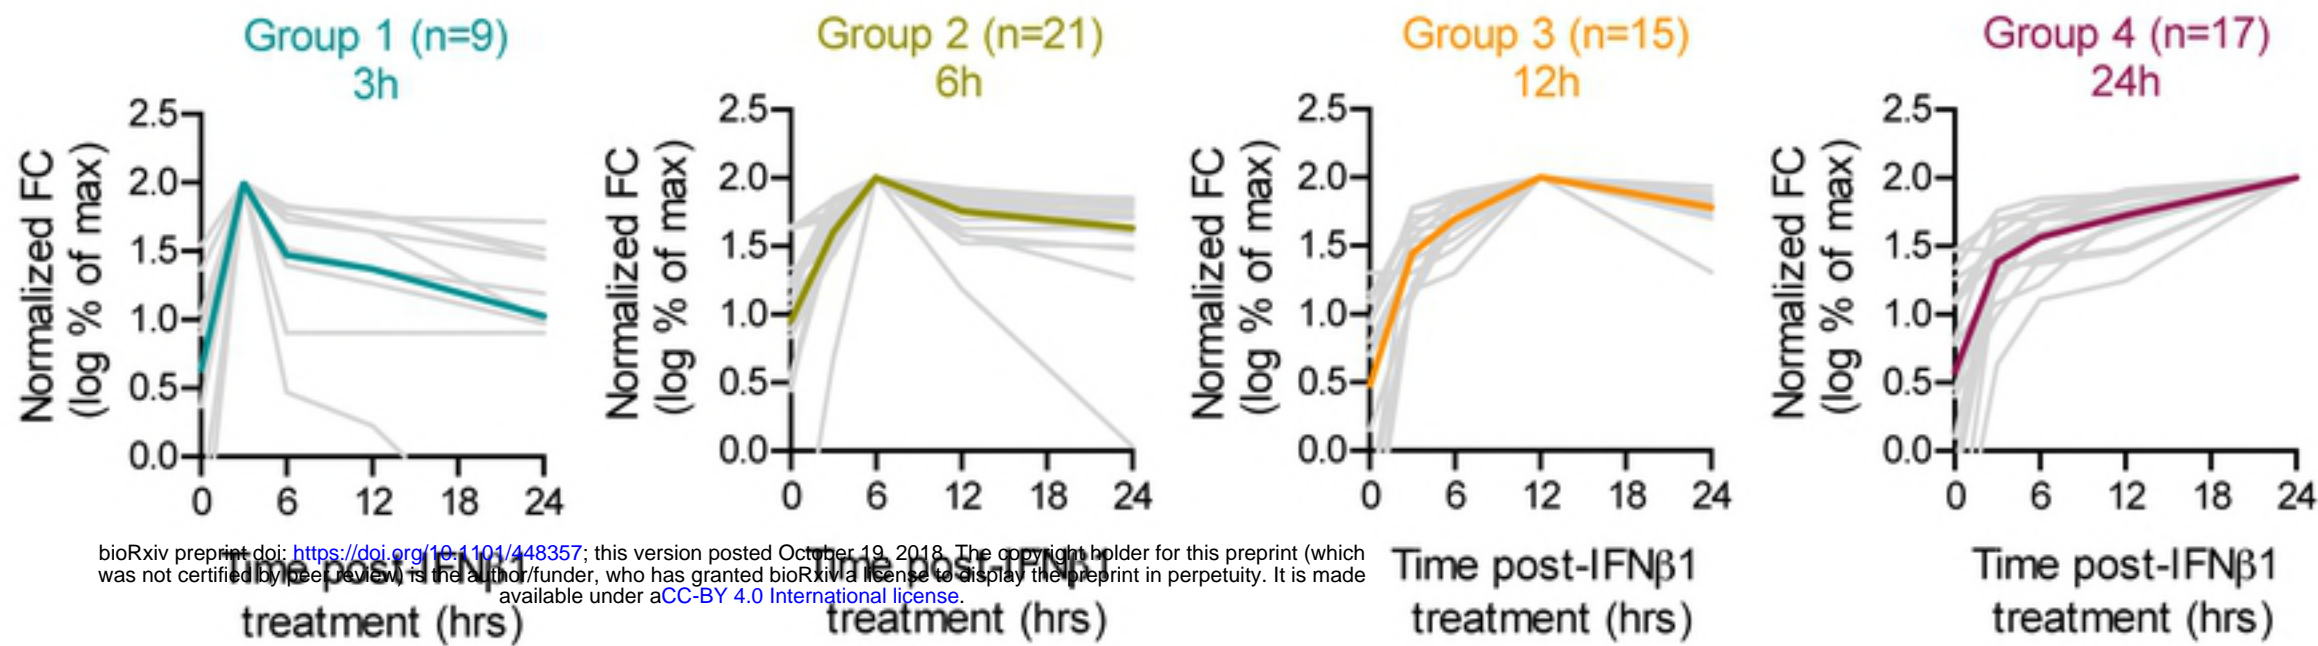

B

IFN $\lambda$ 1,2,3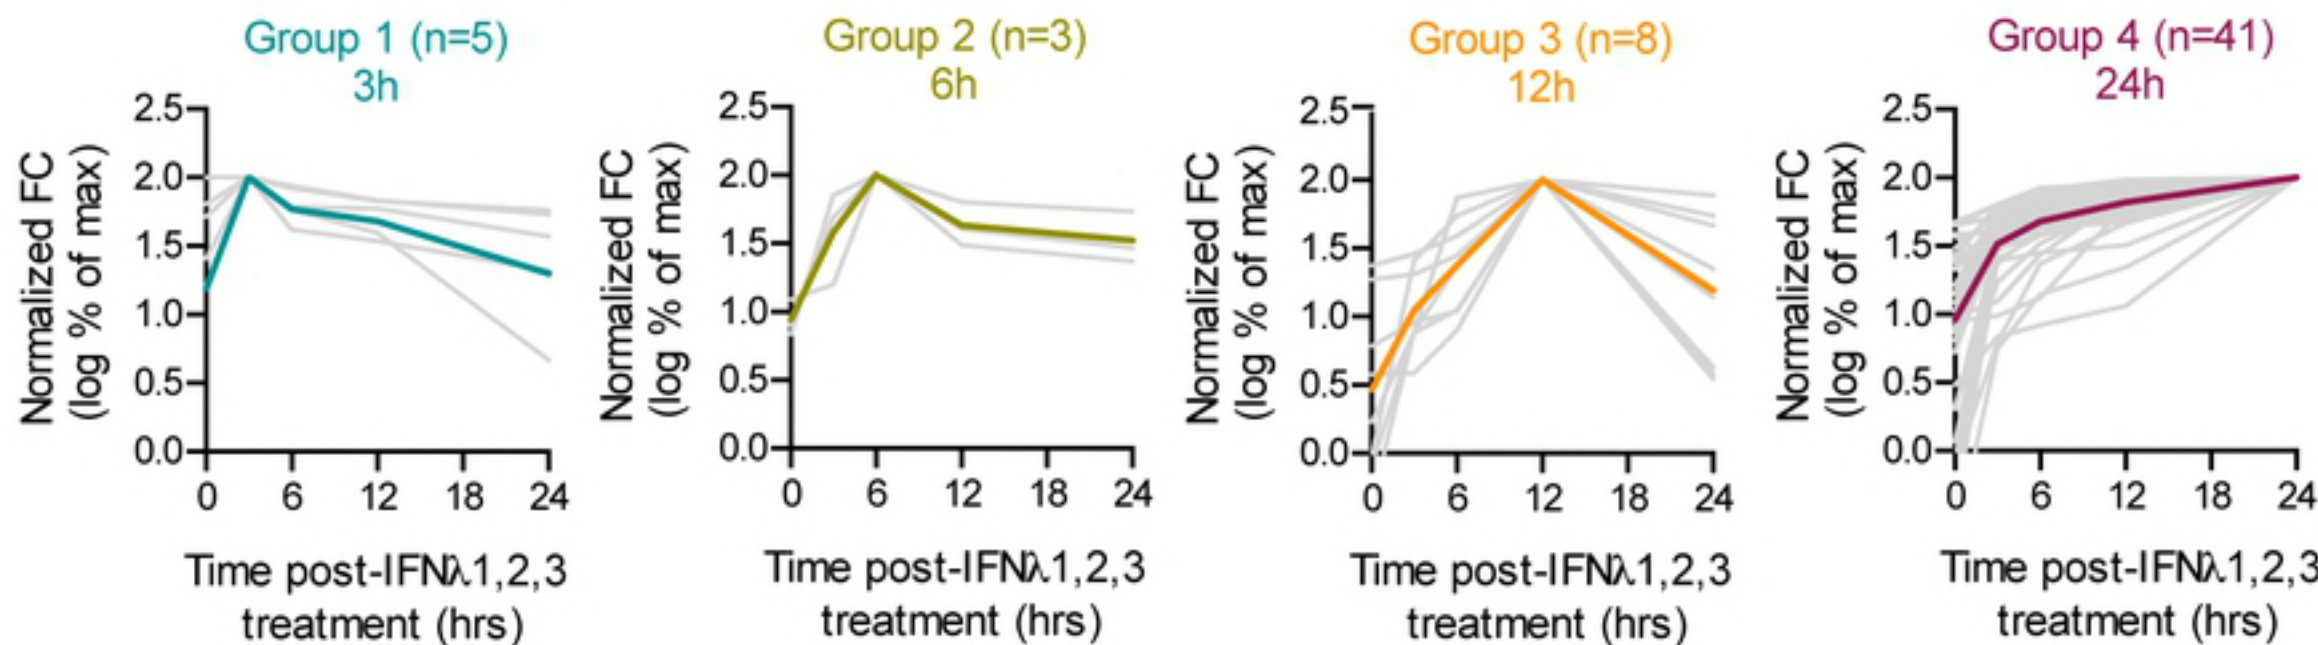

C

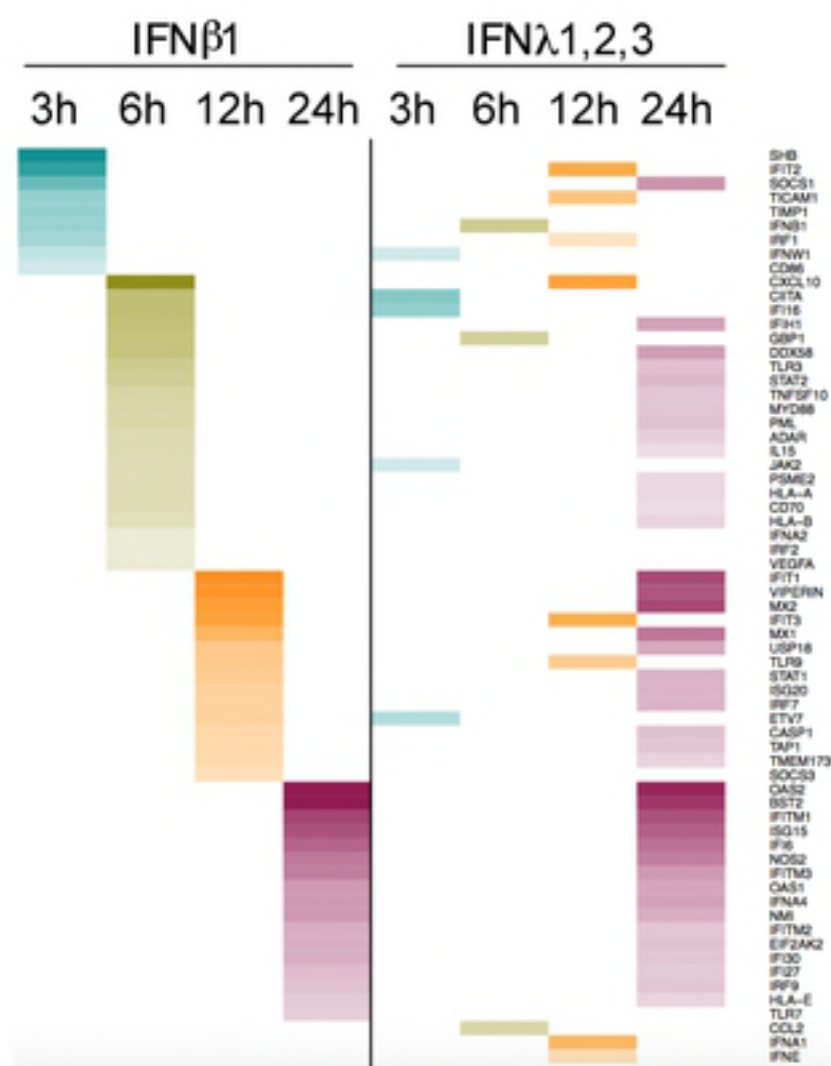

D

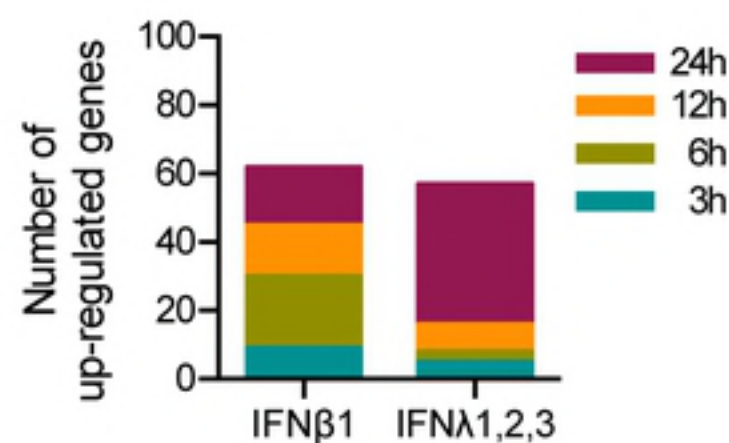

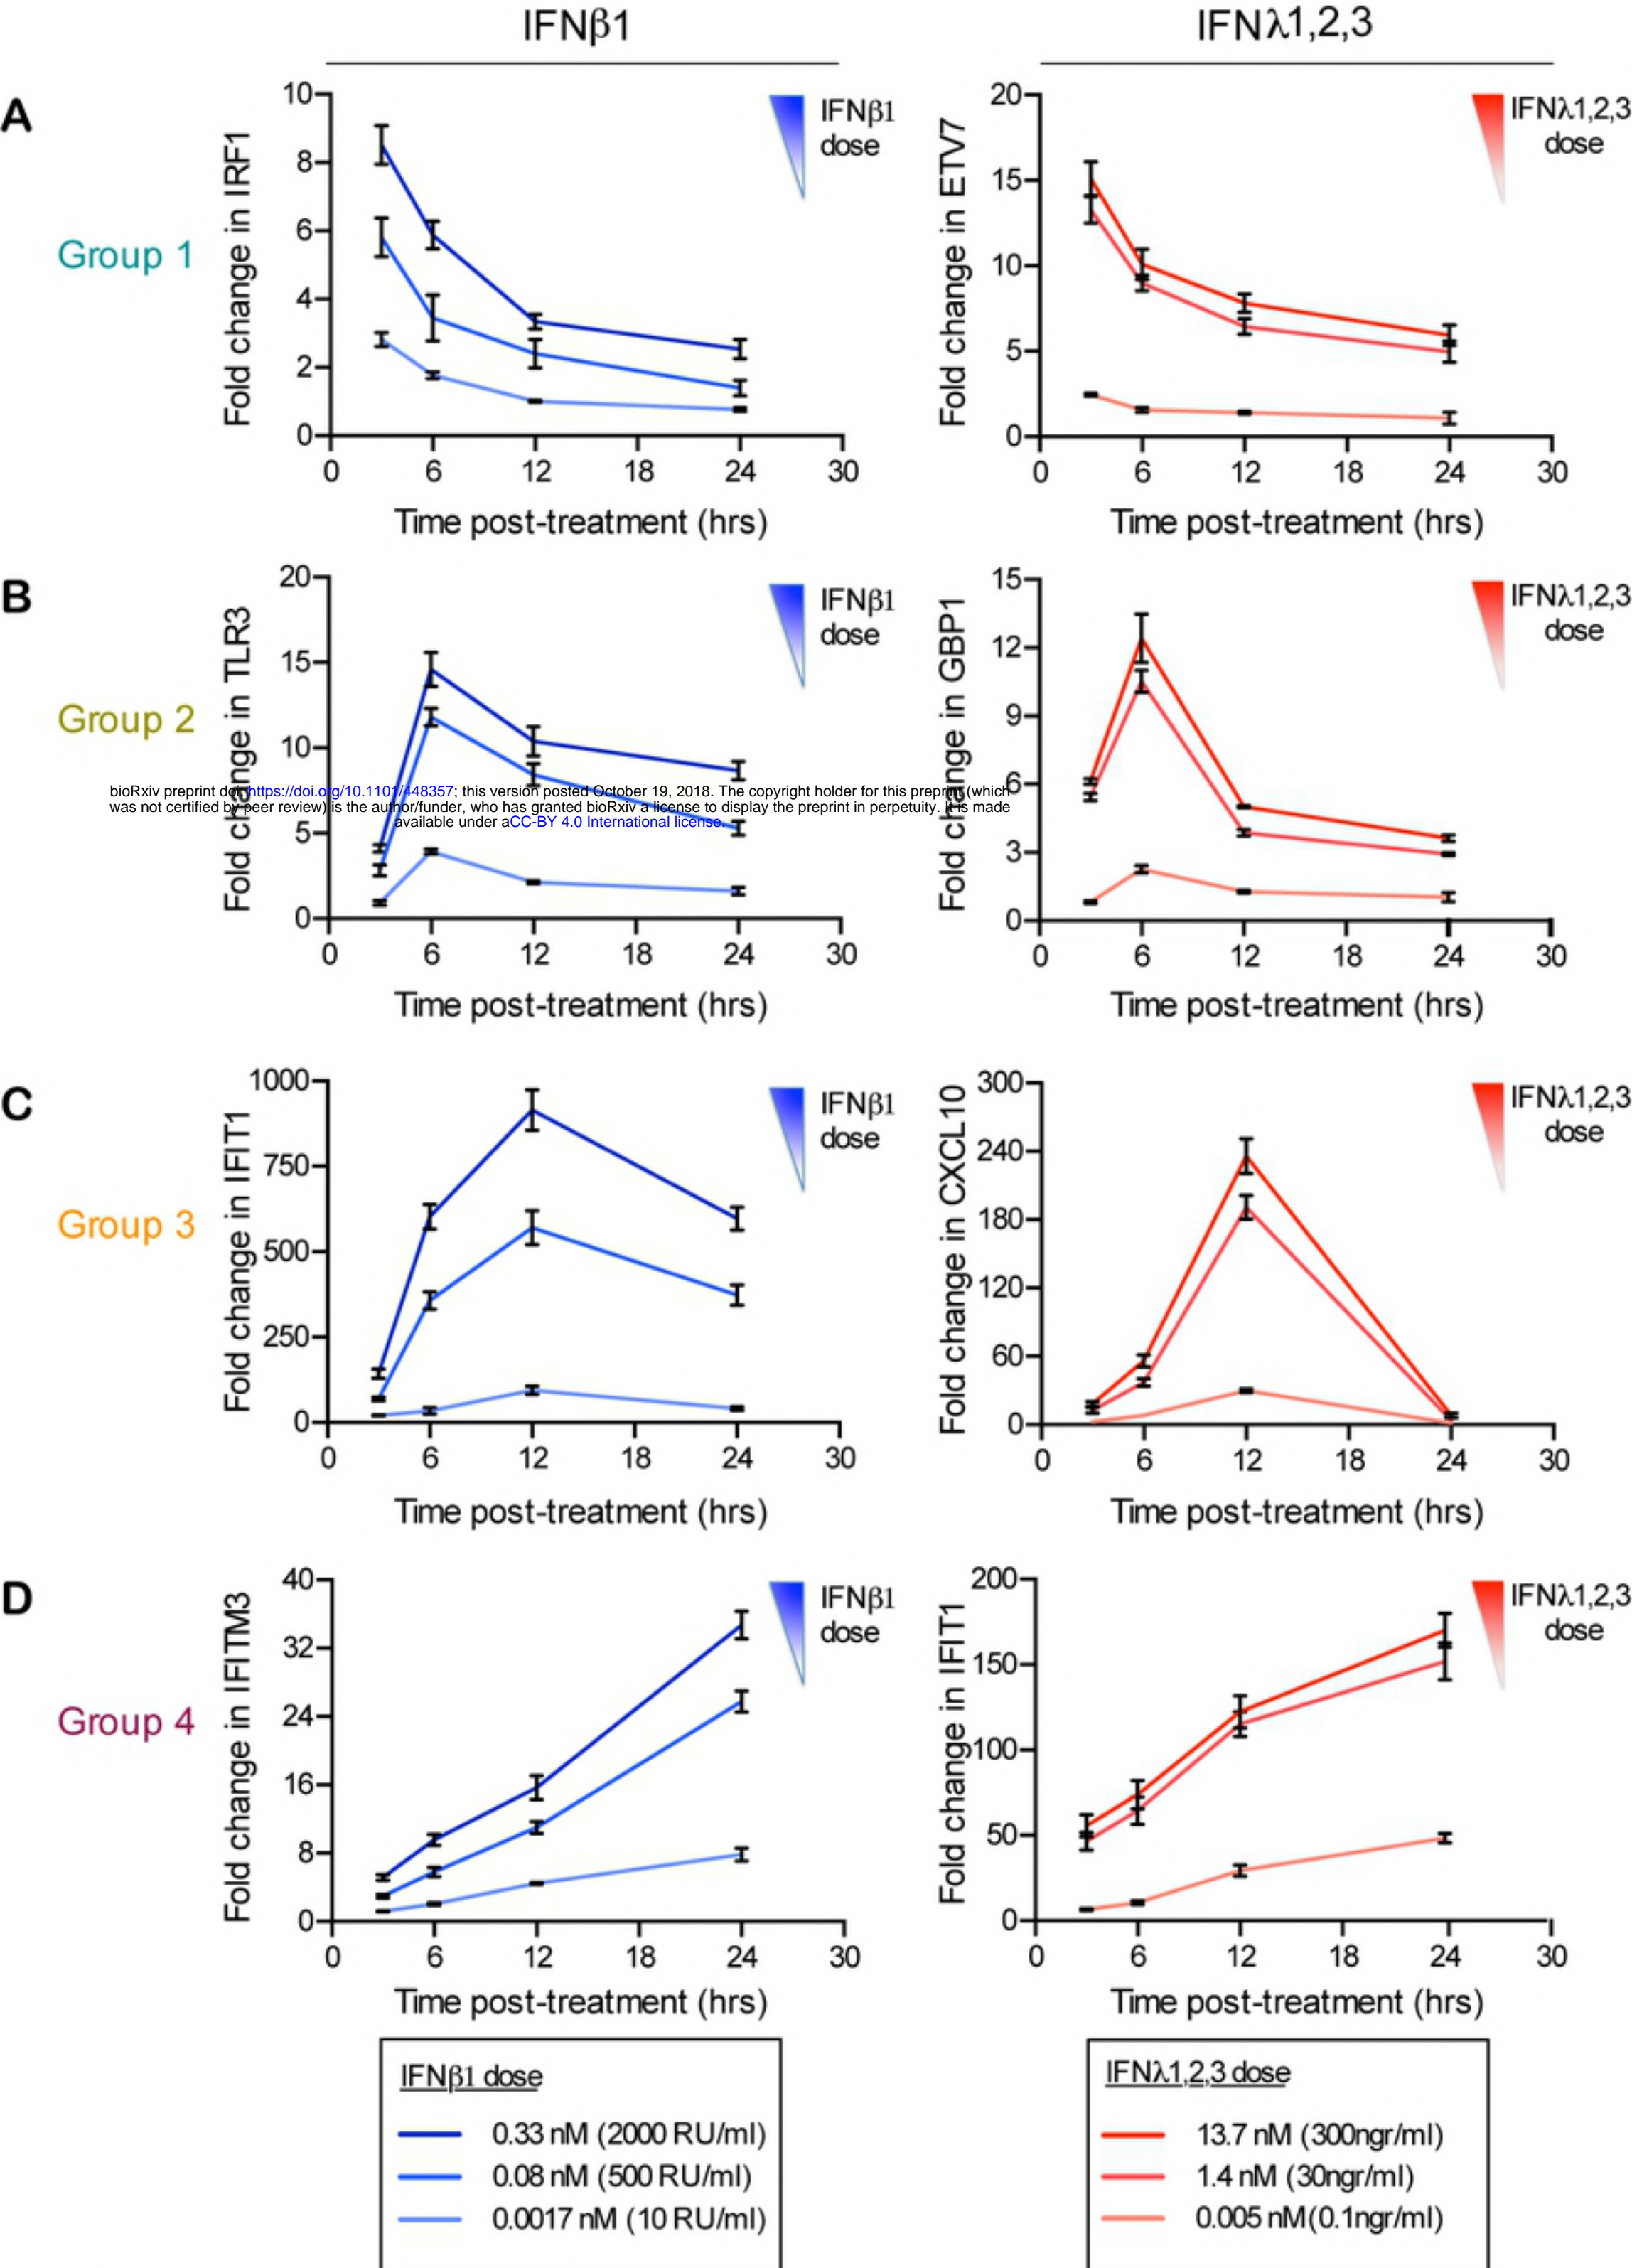

Fig4.tiff



A

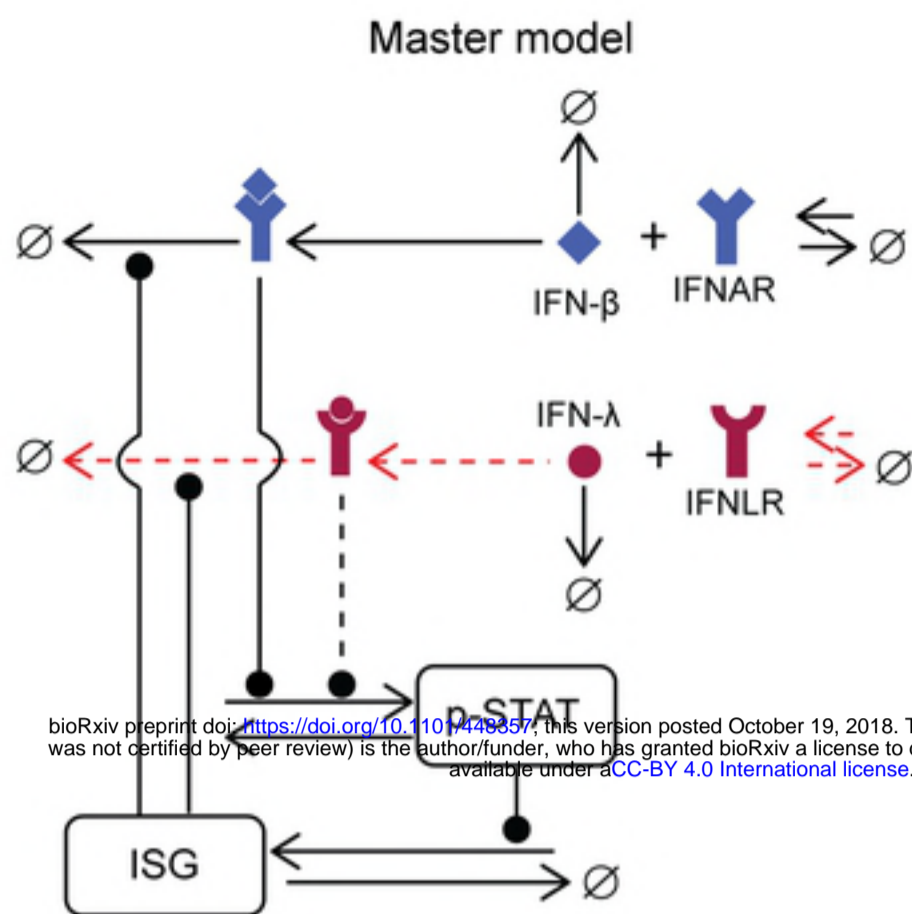

B

Alternative models (unique features)

| Model name                             | M <sub>3</sub> | M <sub>2</sub> | M <sub>4</sub> | M <sub>1</sub> |
|----------------------------------------|----------------|----------------|----------------|----------------|
| Receptor abundance                     |                |                |                |                |
| Different receptor activity regulation |                |                |                |                |
| Different rates for STAT activation    |                |                |                |                |

■ present in the model    ■ absent in the model

Model ranking result

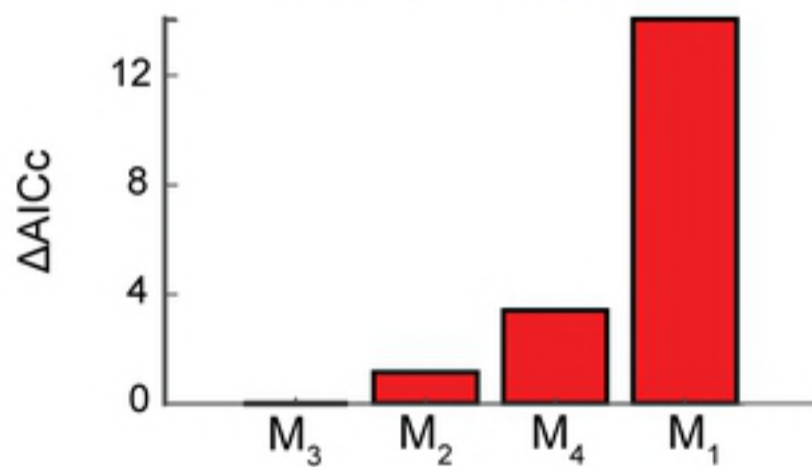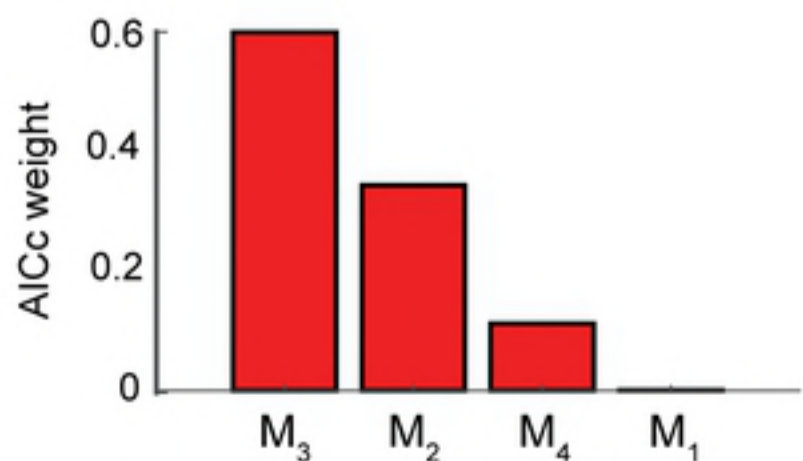

C

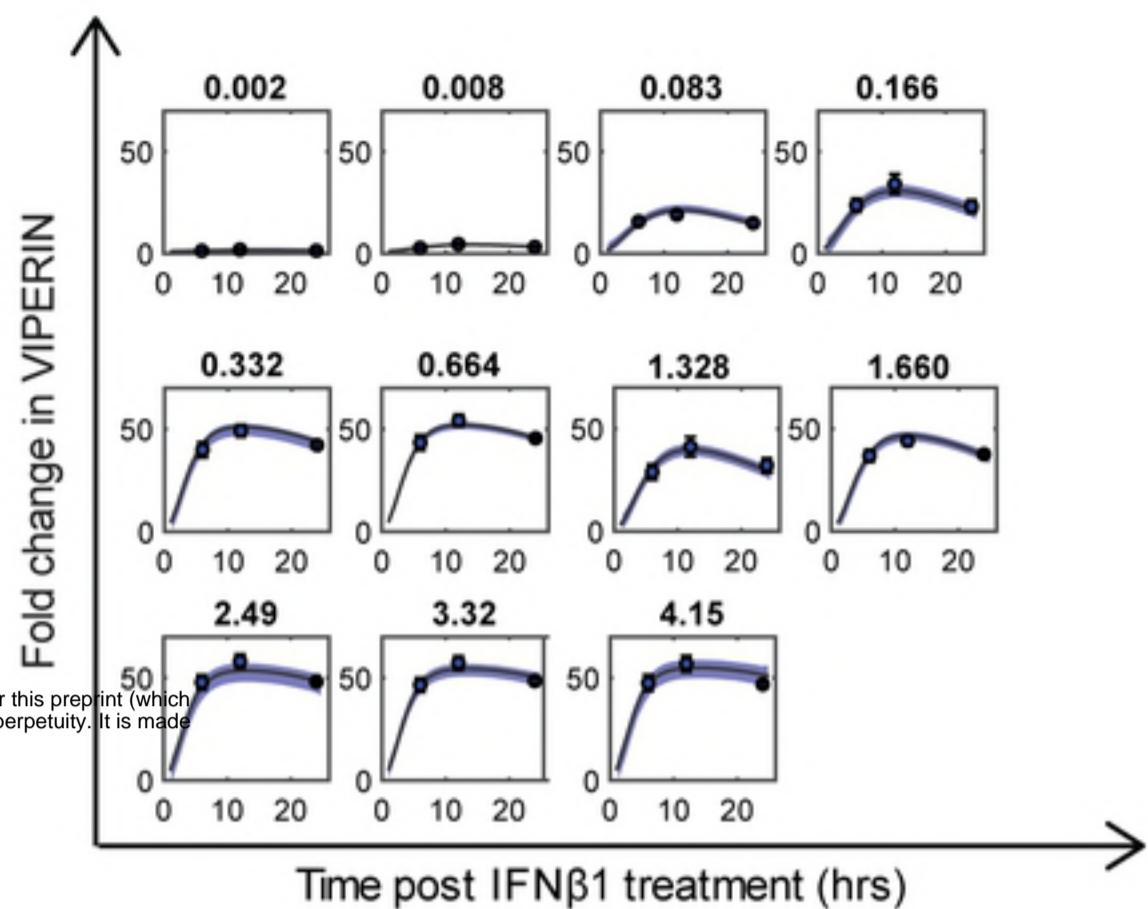

D

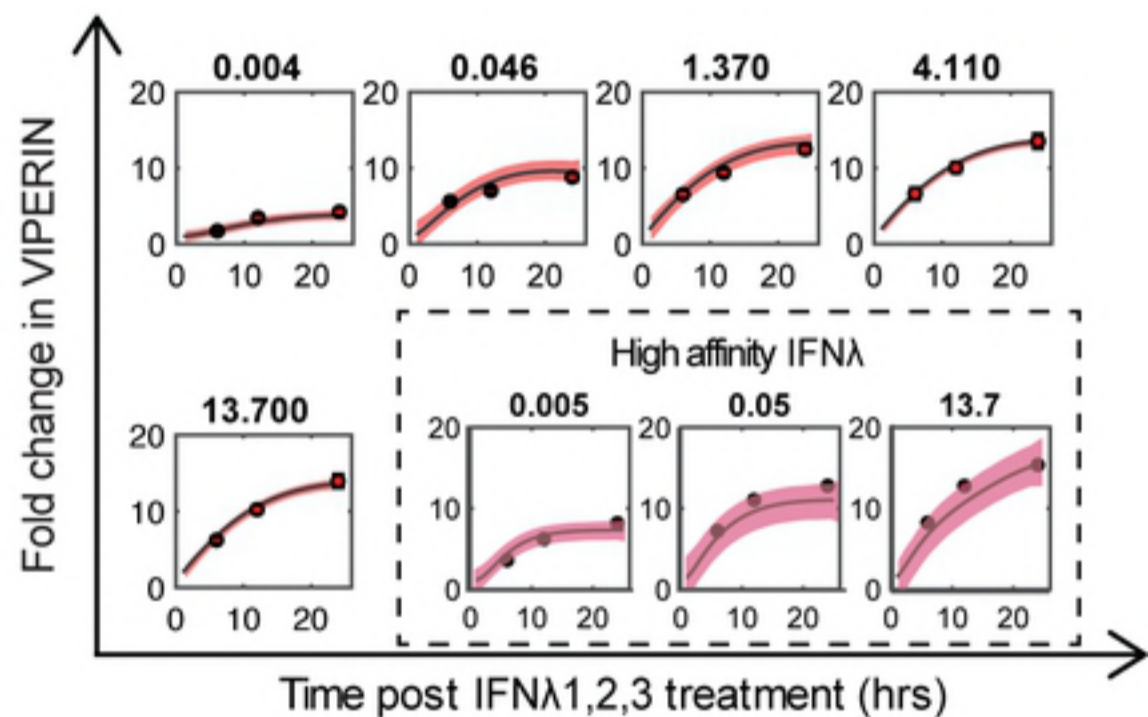

E

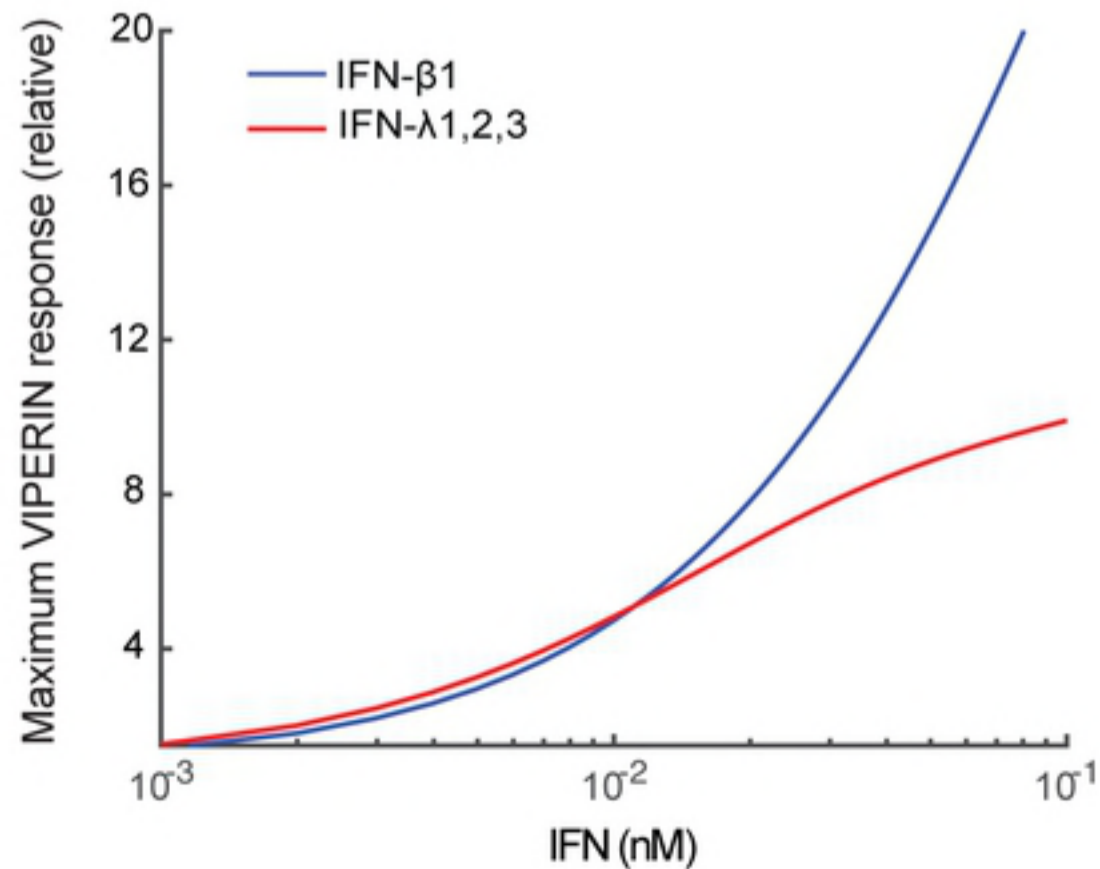

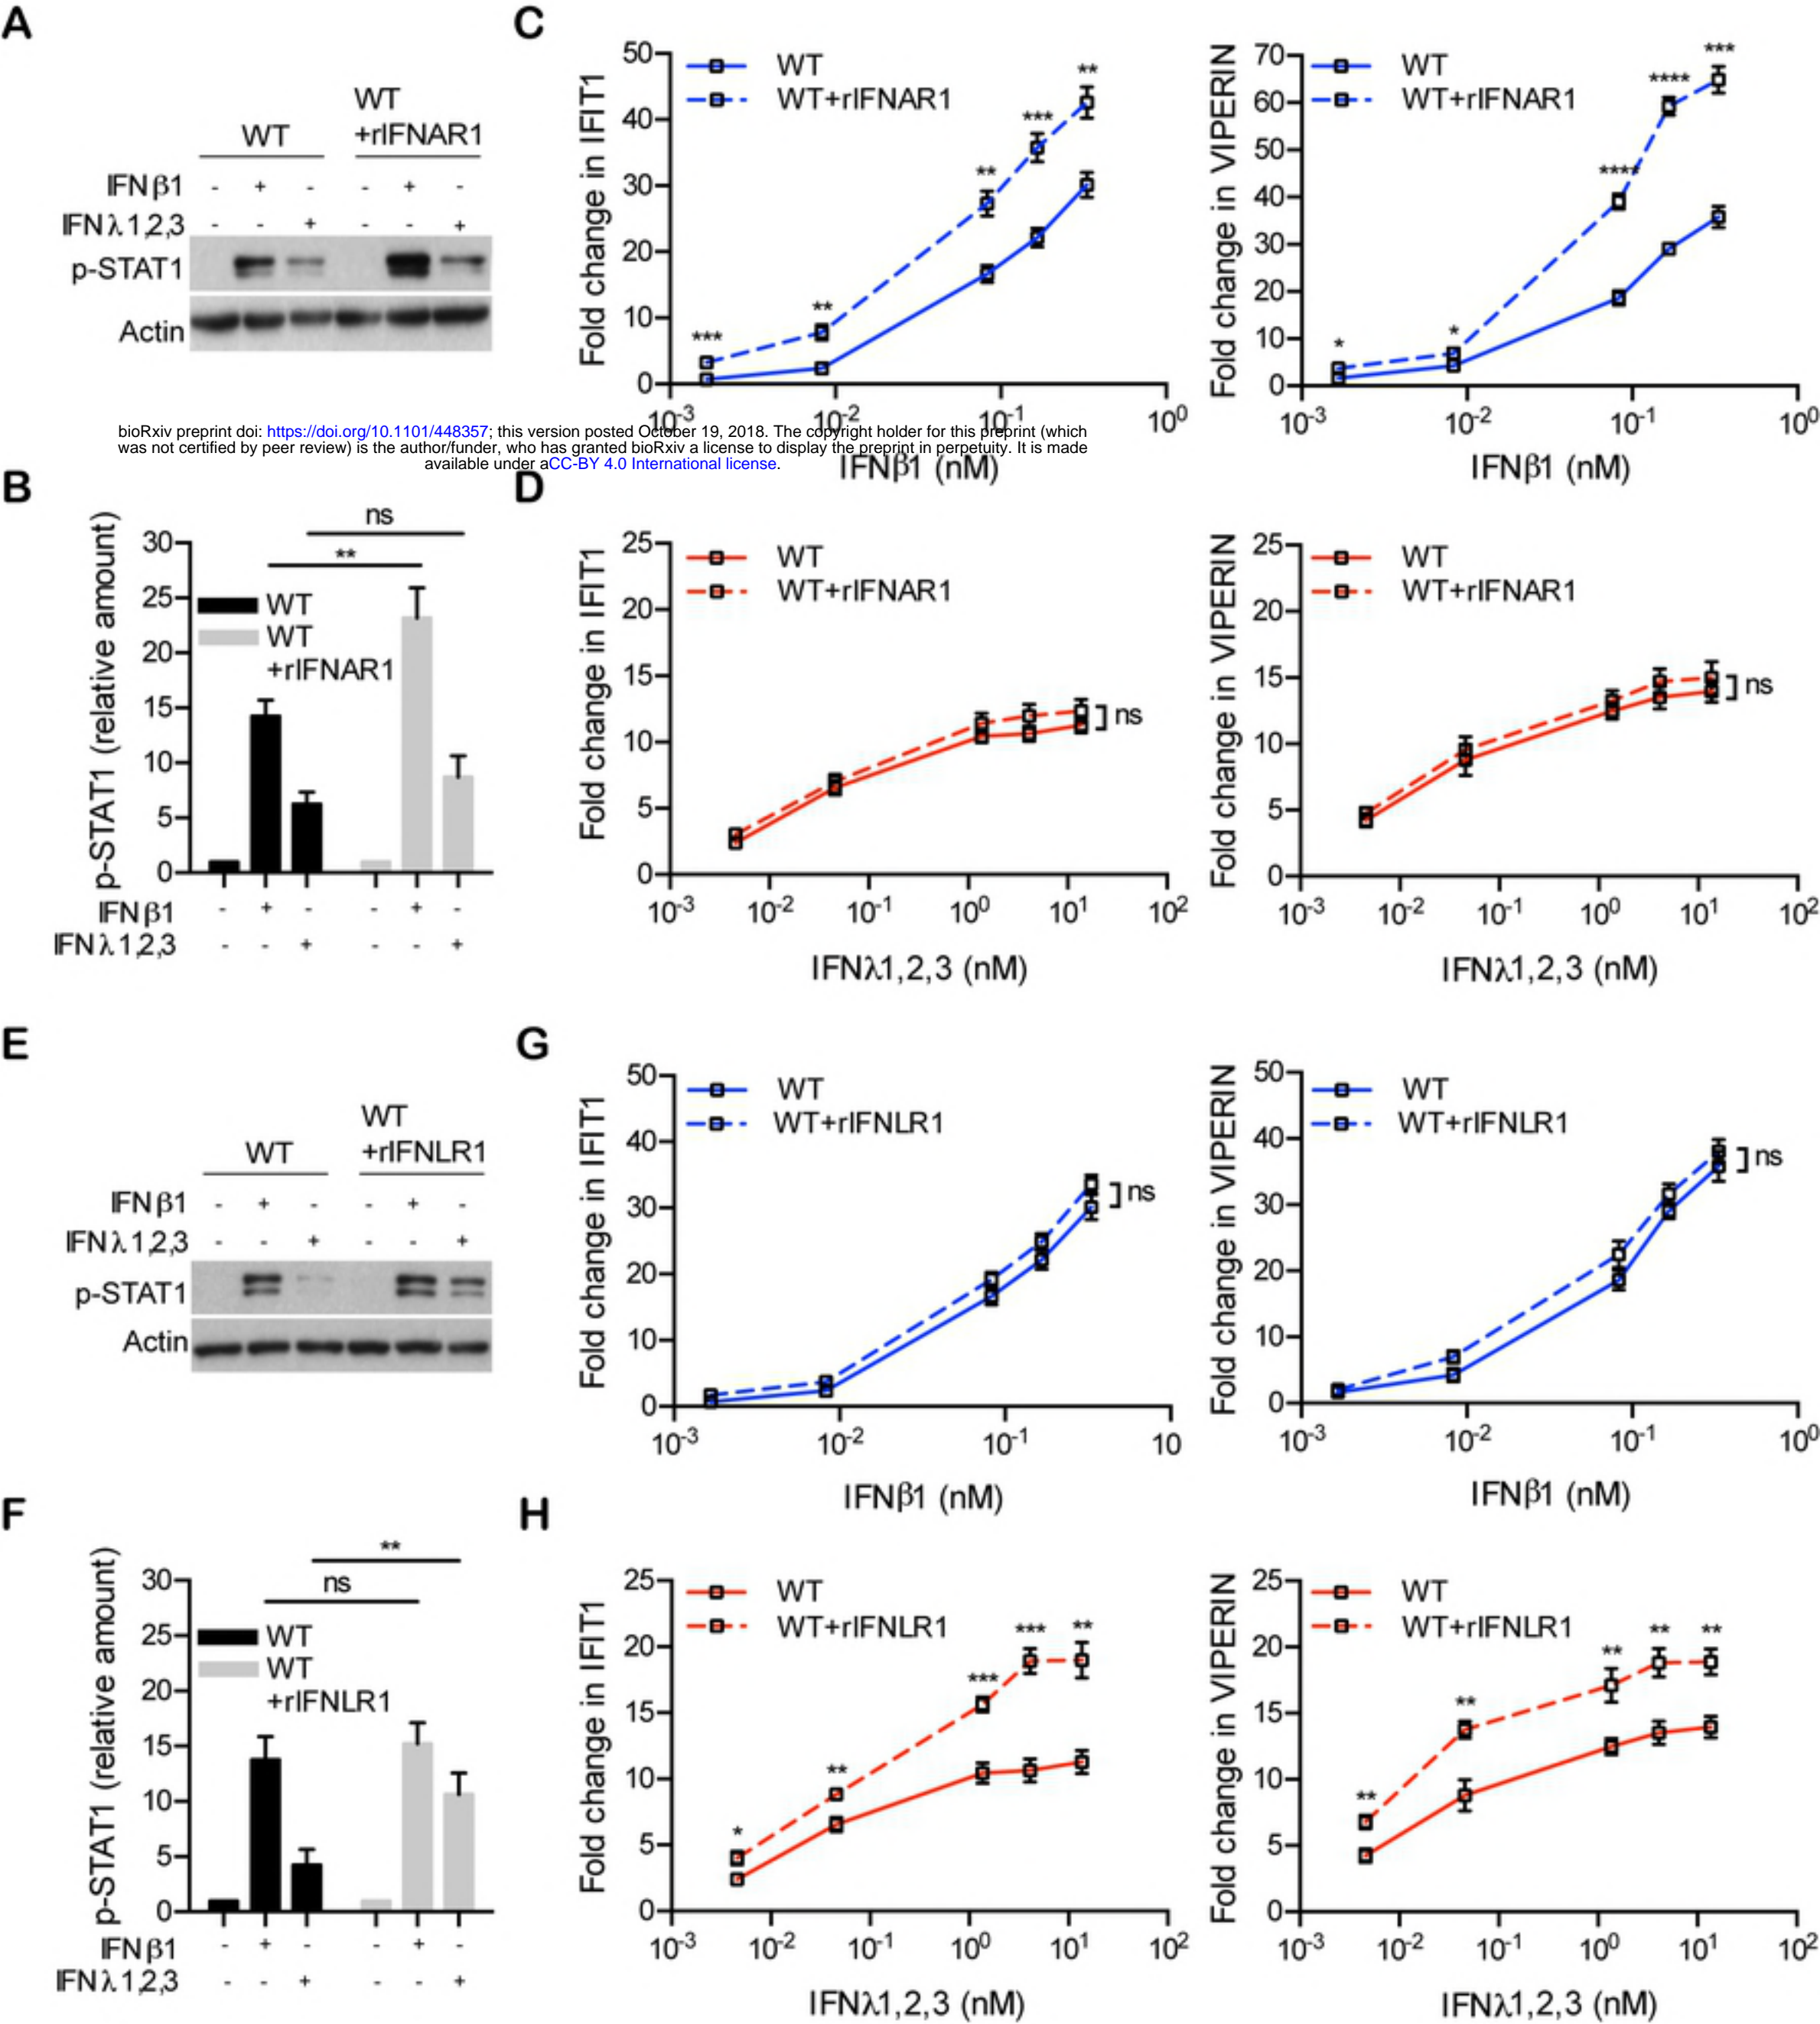

Fig6.tiff



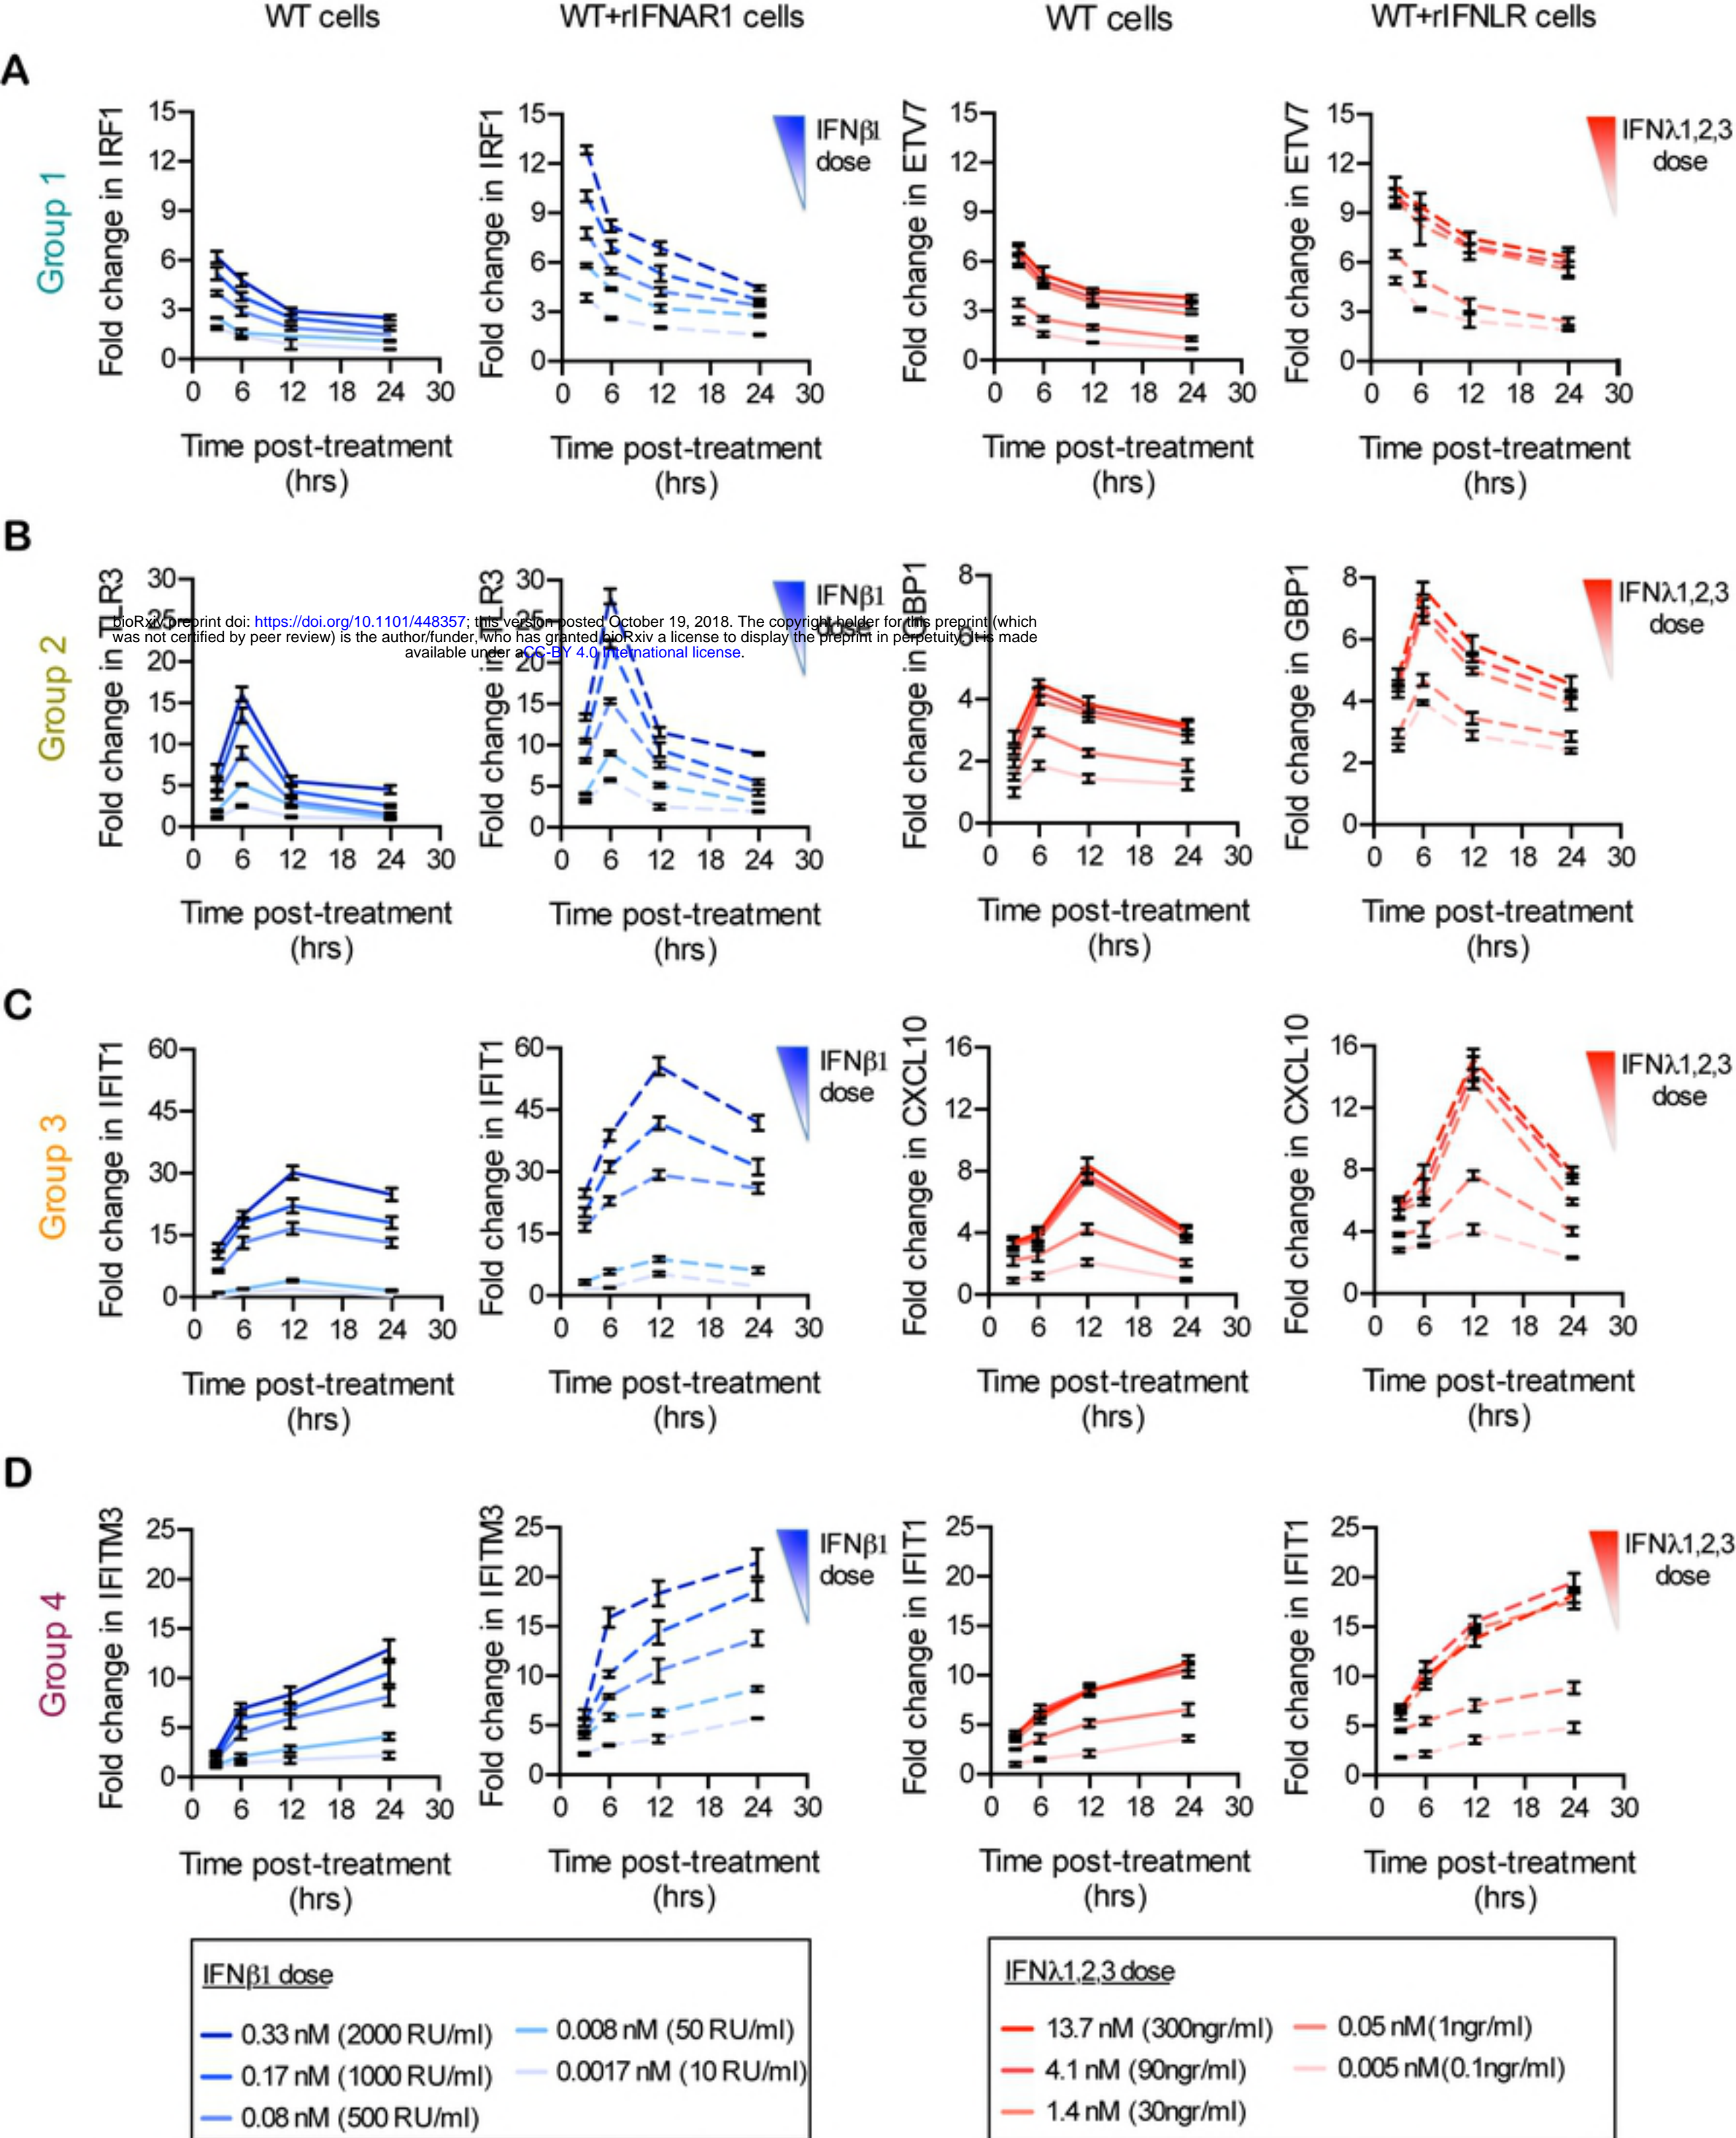

Fig7.tiff



A

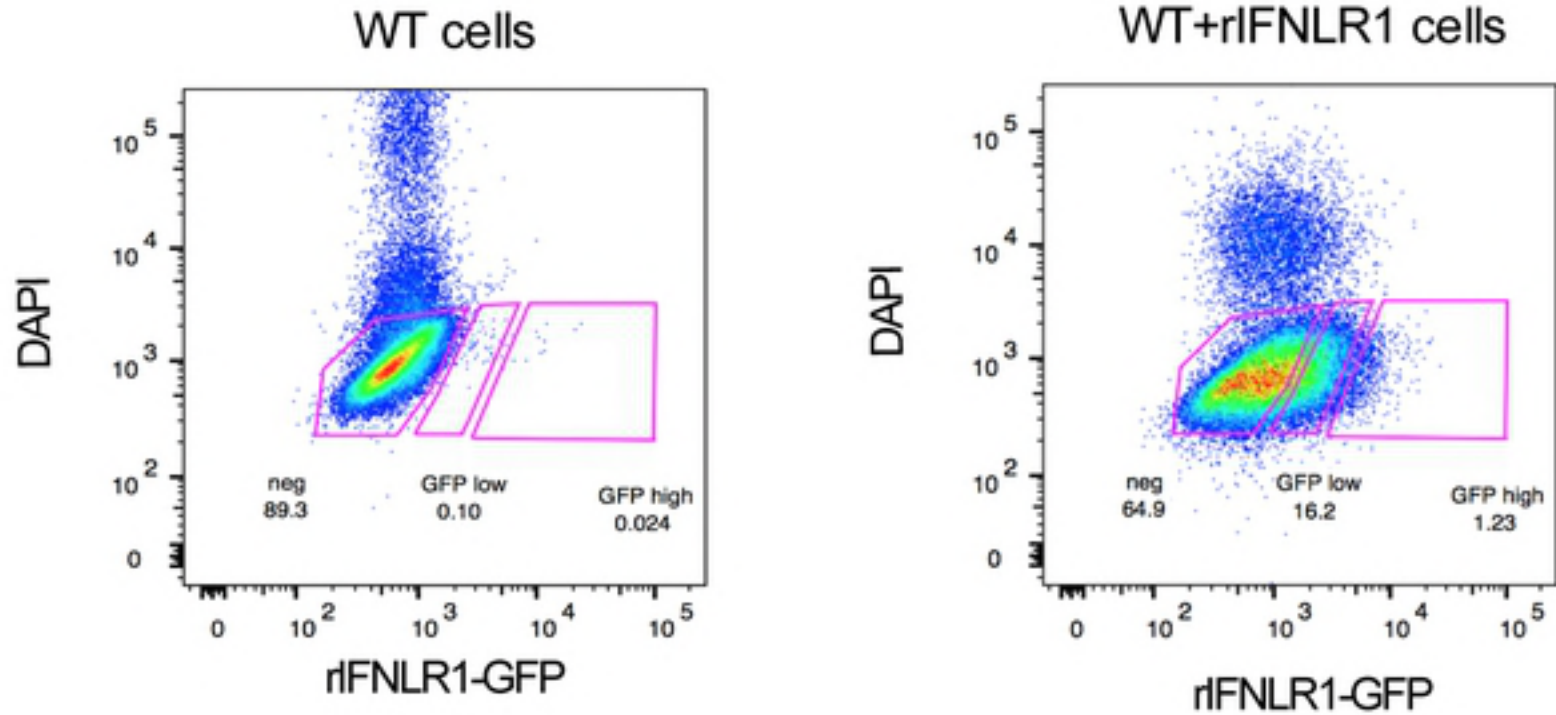

B

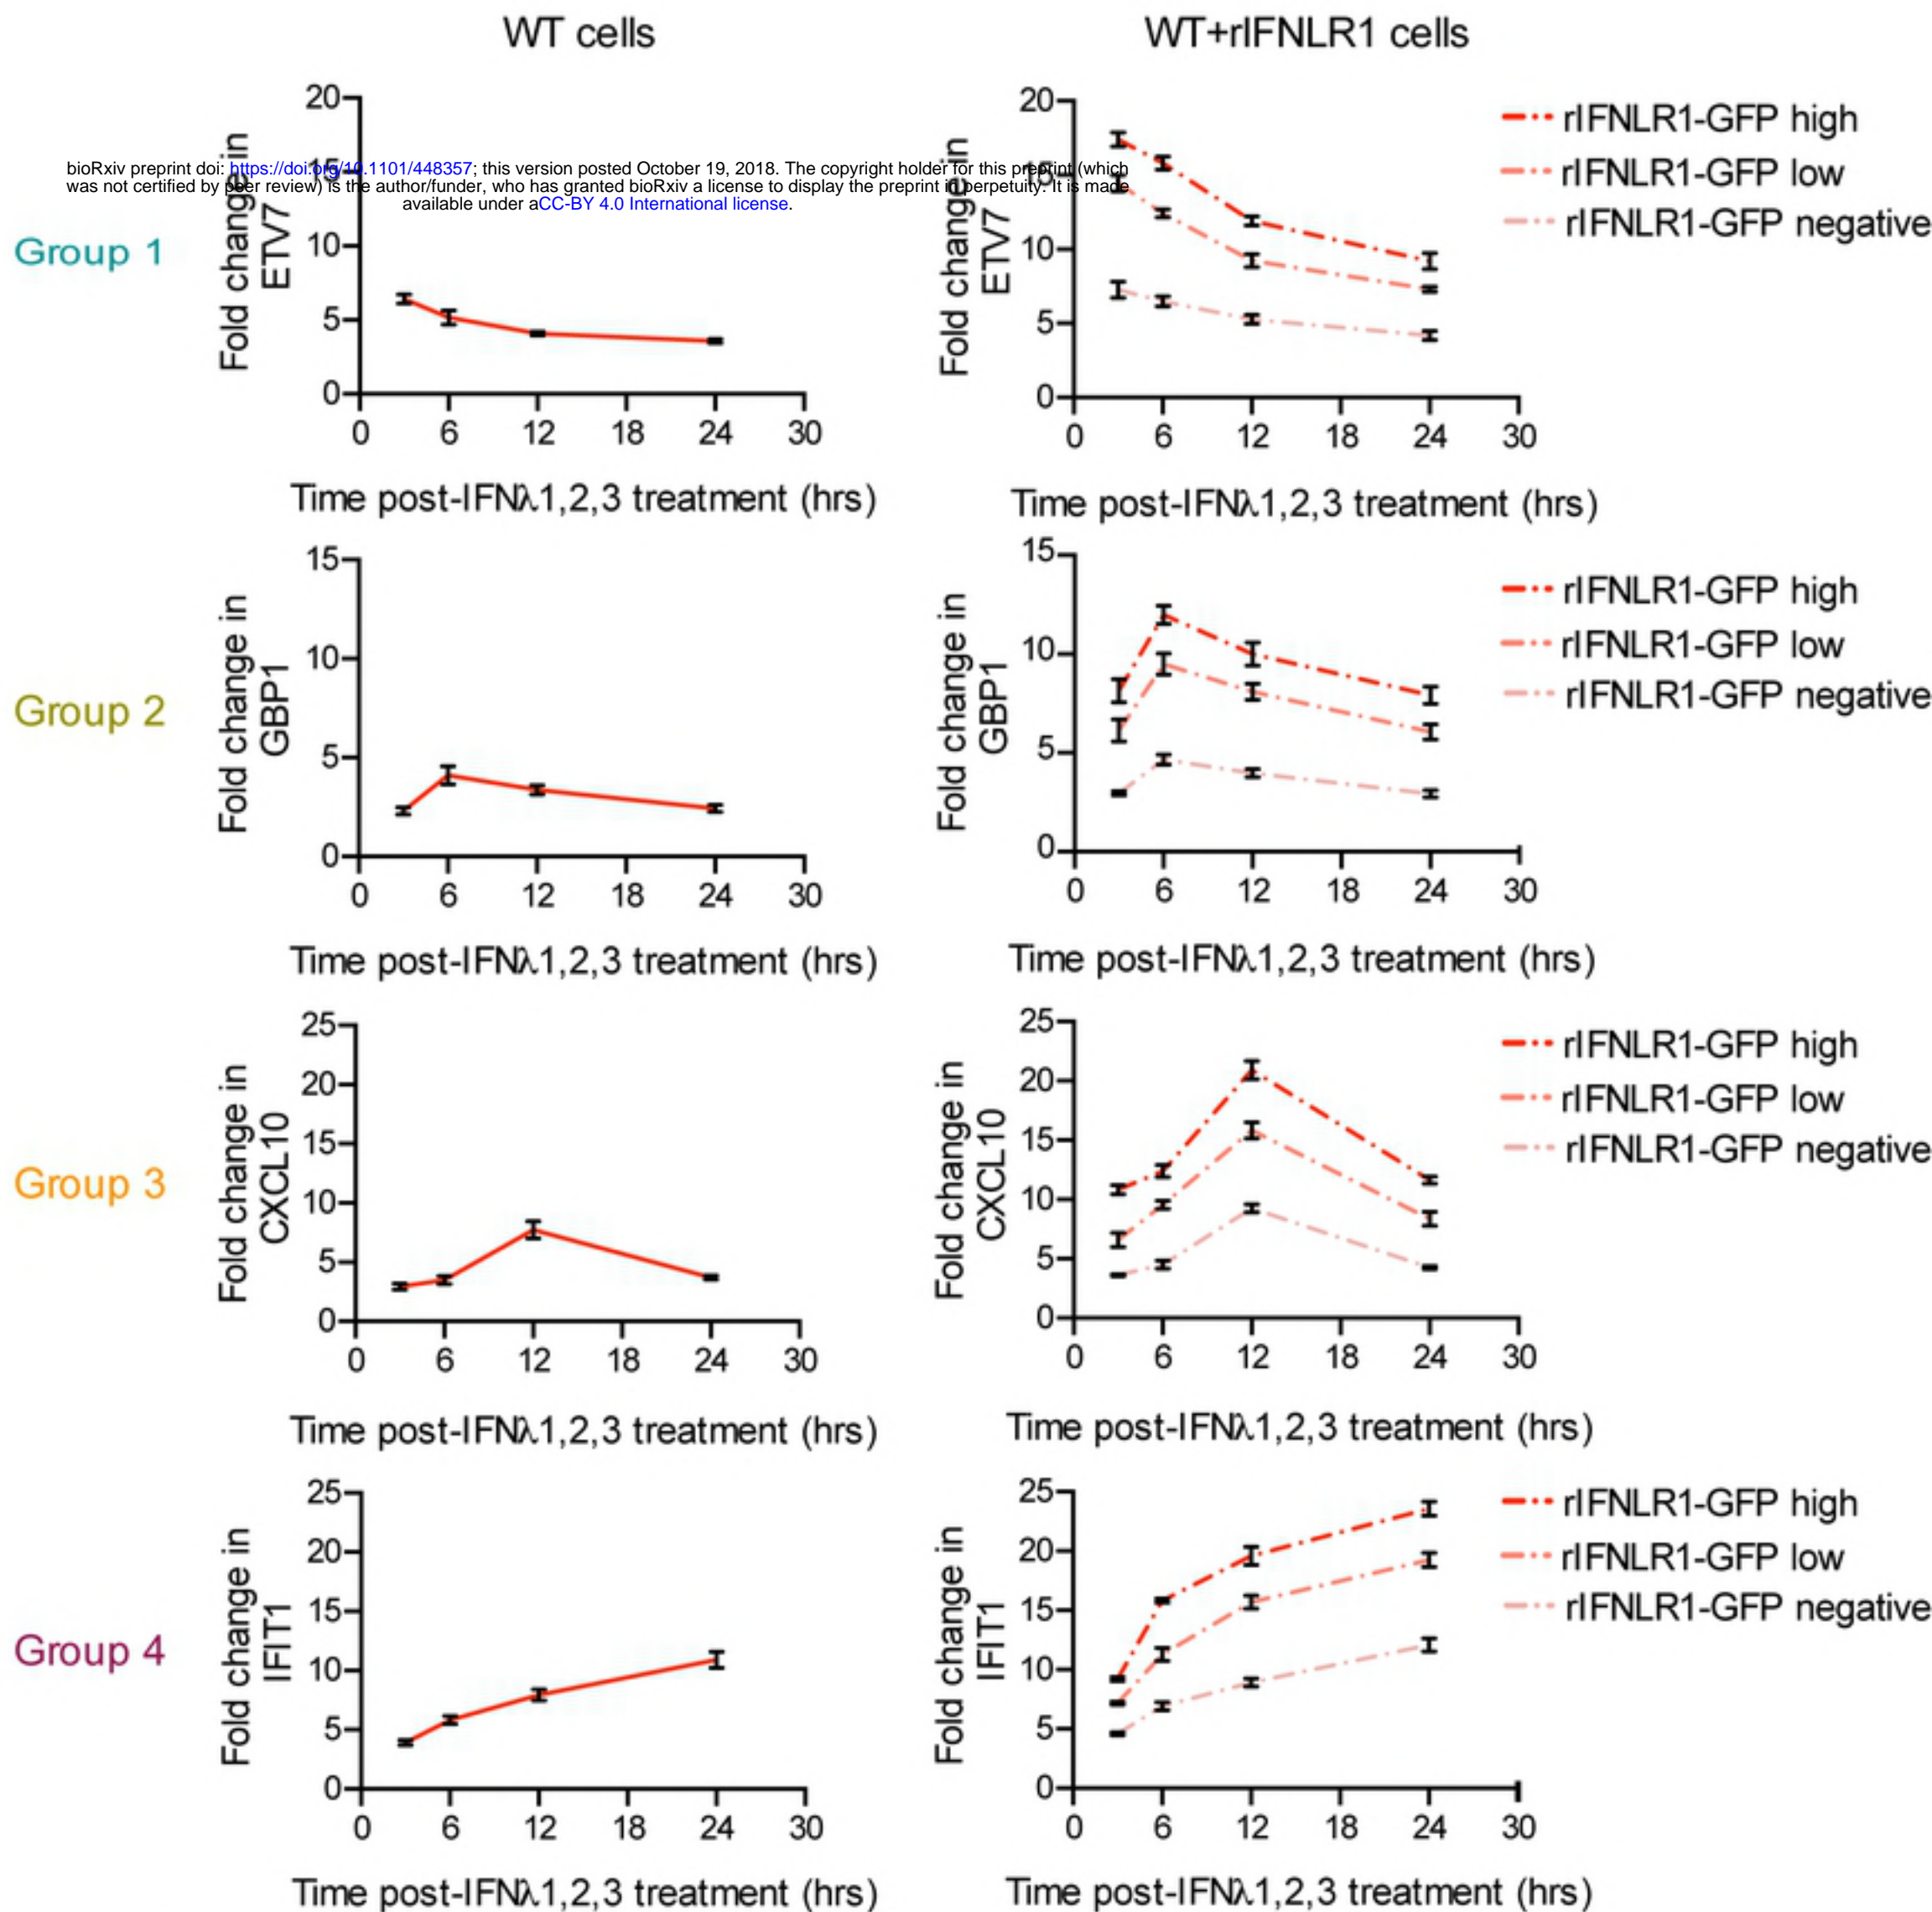

Fig8.tiff
